# Supplementary material for: Loss of the transcription factor MAFB limits β-cell derivation from human PSCs
Source: PubMed Central journal article supplement (PMC7265500; doi:10.1038/s41467-020-16550-9), 2020-06-02
Supplement: 41467_2020_16550_MOESM1_ESM.pdf [file 41467_2020_16550_MOESM1_ESM.pdf]

## Supplementary Information

### Loss of the transcription factor MAFB limits $\beta$ -cell derivation from human PSCs

Russell et al.

# Supplementary Figure 1

**A**

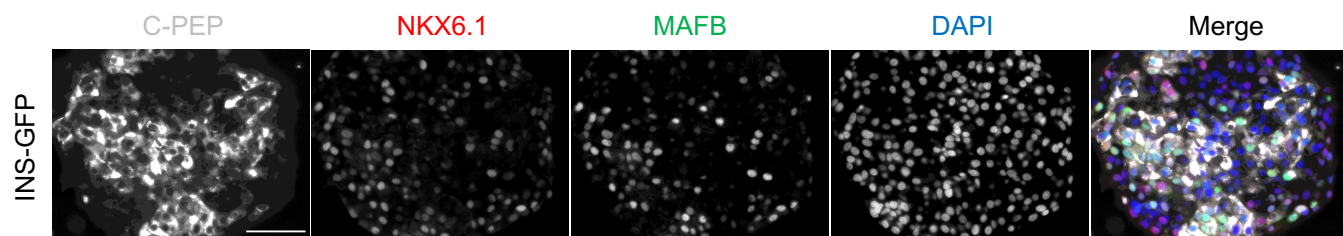

**B**

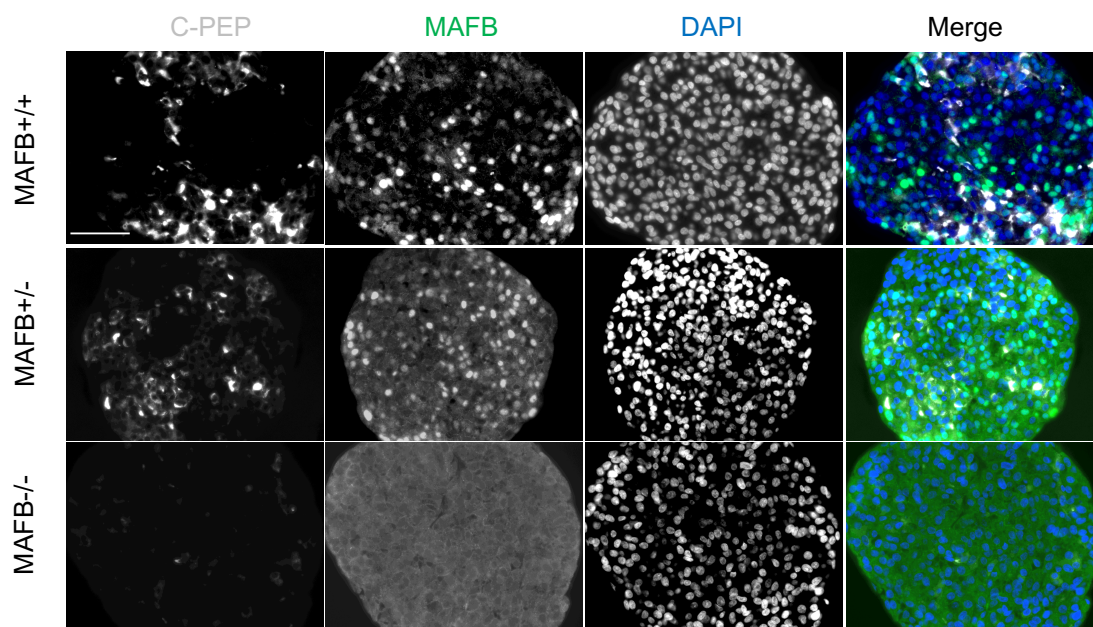

## Supplementary Figure 1. MAFB is expressed in hESC derived $\beta$ -cells.

(A) Representative IF images from 4 independent experiments of INS-GFP cells at the  $\beta$ -cell stage depicting C-PEP, NKX6.1, MAFB and DAPI. Scale bars, 50  $\mu$ m.

(B) Representative IF images from 3 independent experiments from the  $\beta$ -cell stage of differentiation depicting C-PEP and MAFB expression in MAFB  $+/+$ ,  $+/-$  and  $-/-$  cells. DAPI indicates nuclear staining. Scale bars, 50  $\mu$ m.

# Supplementary Figure 2

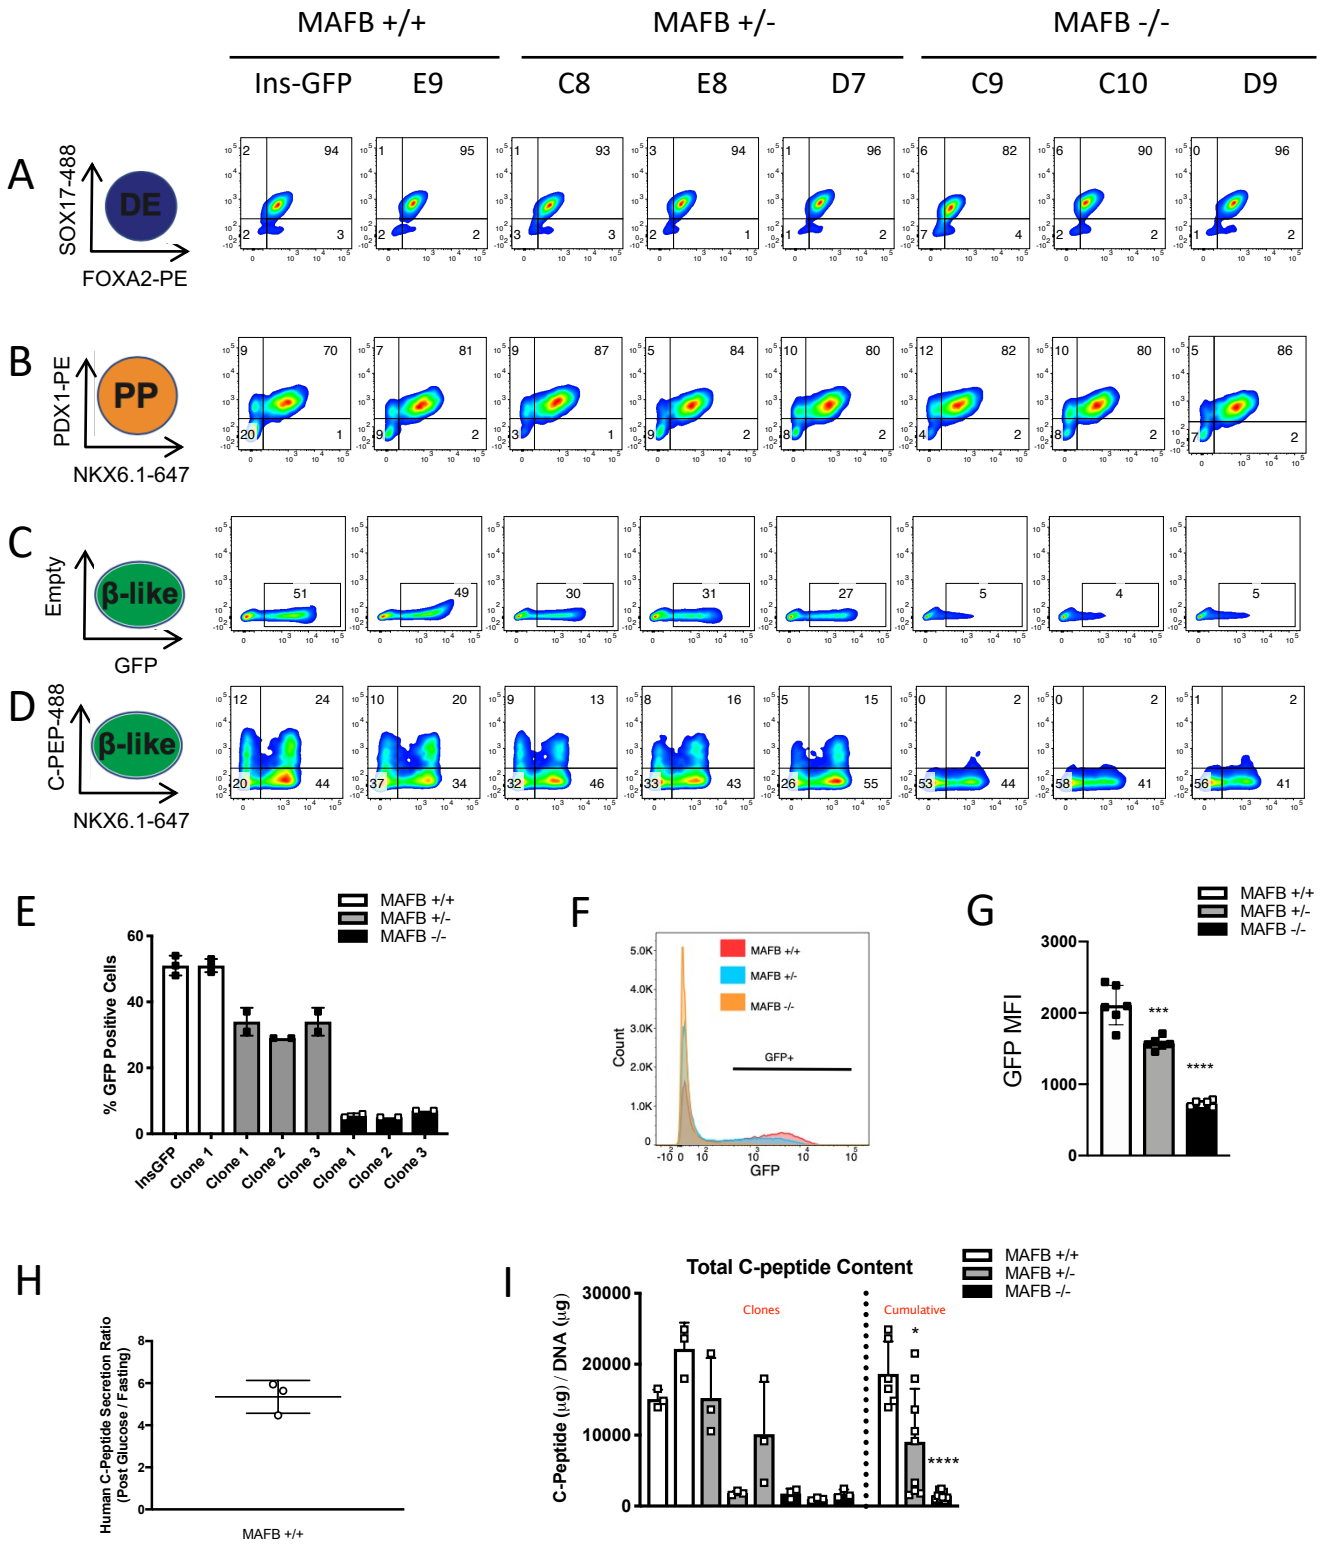

## Supplementary Figure 2. Loss of MAFB inhibits $\beta$ -cell derivation.

(A) Representative FC plots depicting the percentages of SOX17<sup>+</sup> FOXA2<sup>+</sup> at the DE stage for individual clones.

(B) Representative FC plots depicting the percentages of PDX1<sup>+</sup> NKX6.1<sup>+</sup> at the PP stage for individual clones.

(C) Representative FC plots depicting the percentages of GFP<sup>+</sup> cells at the  $\beta$ -cell stage for individual clones.

(D) Representative FC plots depicting the percentages of C-PEP<sup>+</sup> NKX6.1<sup>+</sup> cells at the  $\beta$ -cell stage for individual clones.

(E) Quantification of GFP<sup>+</sup> cells for individual clones the  $\beta$ -cell stage.

(F) Representative histograms and (G) Mean fluorescence intensity (MFI) of the GFP positive population in MAFB <sup>+/+</sup>, <sup>+/-</sup> and <sup>-/-</sup> cells. P values by one-way ANOVA followed by Dunnett's multiple comparisons test were \*\*\*P < 0.0004 \*\*\*\*P < 0.0001. N = 6 independent experiments.

(H) Stimulation index of MAFB <sup>+/+</sup> cells at 5 weeks post-transplantation. N = 3 independent mice.

(I) Total C-PEP content from individual clones at the  $\beta$ -like cell stage. N = 6 independent experiments.

P values by one-way ANOVA followed by Dunnett's multiple comparisons test were \*P < 0.05, \*\*P < 0.01, \*\*\*P < 0.001, \*\*\*\*P < 0.0001. Data are presented as individual biological replicates and represent the mean  $\pm$  SD.

# Supplementary Figure 3

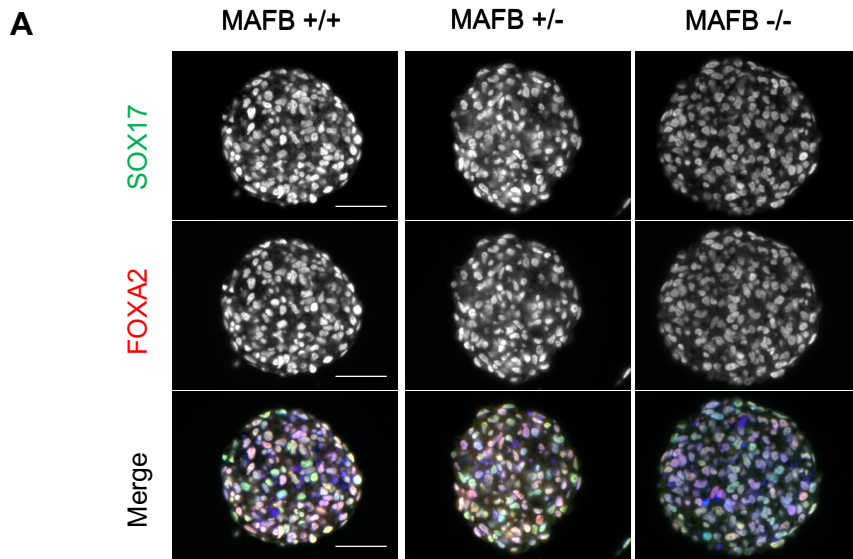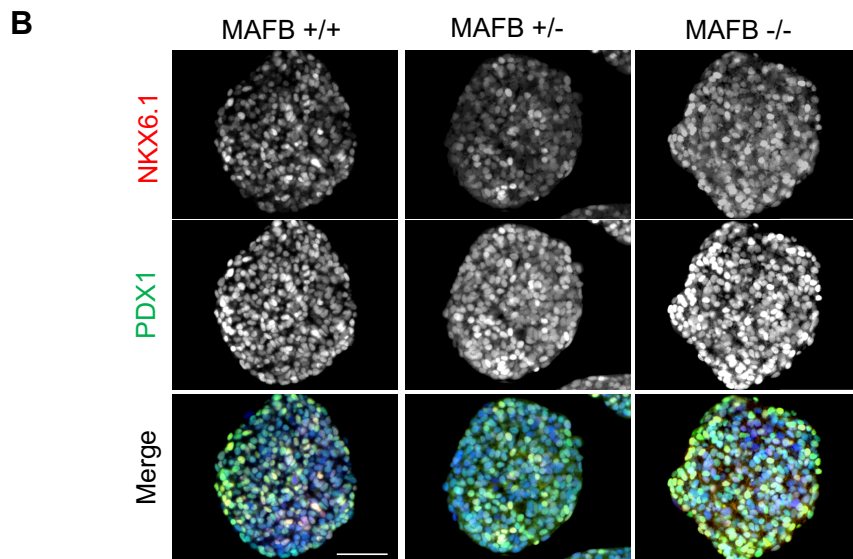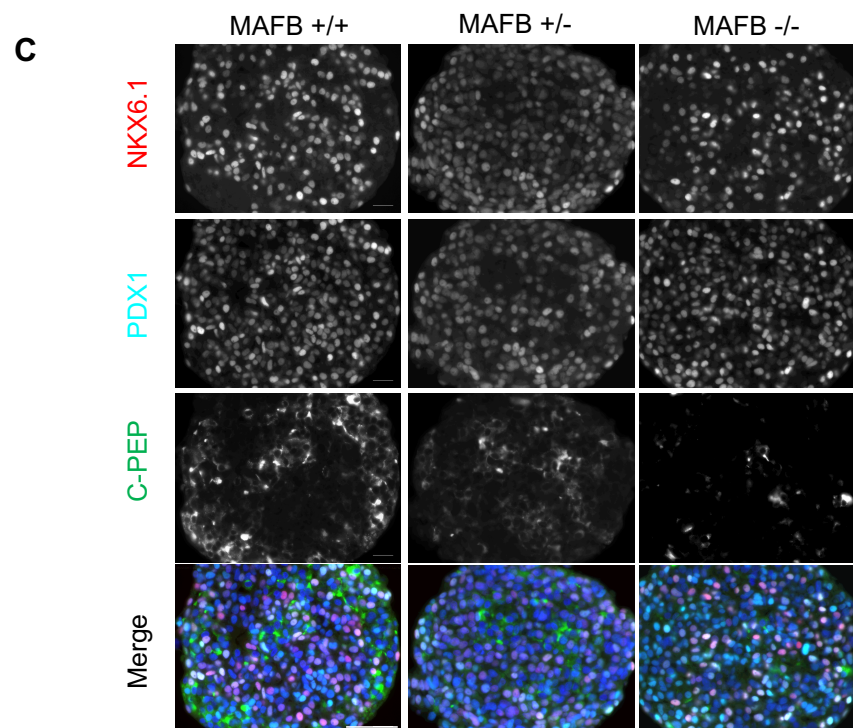

### **Supplementary Figure 3. MAFB is important for $\beta$ -cell derivation.**

(A) Representative images from 6 independent experiments at the DE stage of differentiation depicting SOX17 and FOXA2 staining. Scale bars, 50  $\mu$ m.

(B) Representative images from 6 independent experiments at the PP stage of differentiation depicting PDX1 and NKX6.1 staining. Scale bars, 50  $\mu$ m.

(C) Representative images from 6 independent experiments at the  $\beta$ -like cell stage of differentiation depicting C-PEP co-staining with PDX1 and NKX6.1. Scale bars, 50  $\mu$ m.

## Supplementary Figure 4

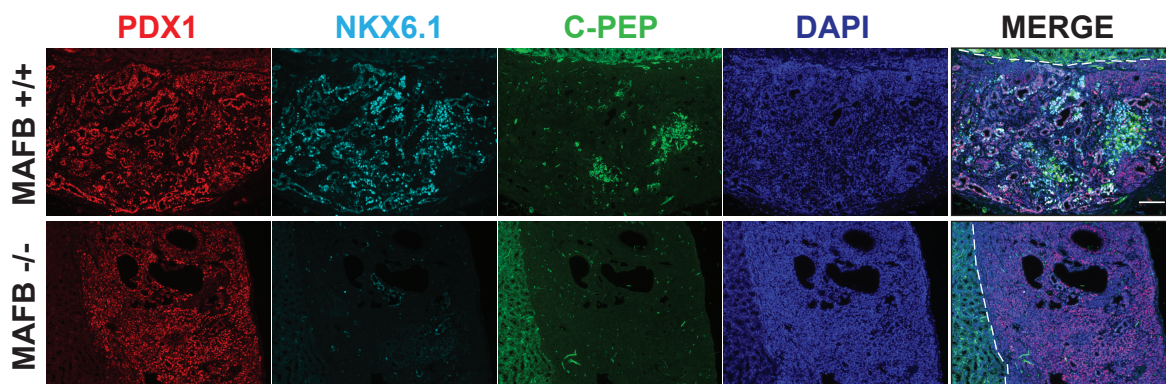

### Supplementary Figure 4. MAFB is required to generate functional $\beta$ -cells *in vivo*.

Representative IF images from 6 independent animals (3 MAFB+/+ and 3 MAFB-/-) for C-PEP co-staining with PDX1 and NKX6.1 of grafts removed from kidney capsules 8 weeks post-transplantation. The graft is delineated and marked from the kidney using dashed lines. Scale bars, 100  $\mu$ m.

# Supplementary Figure 5

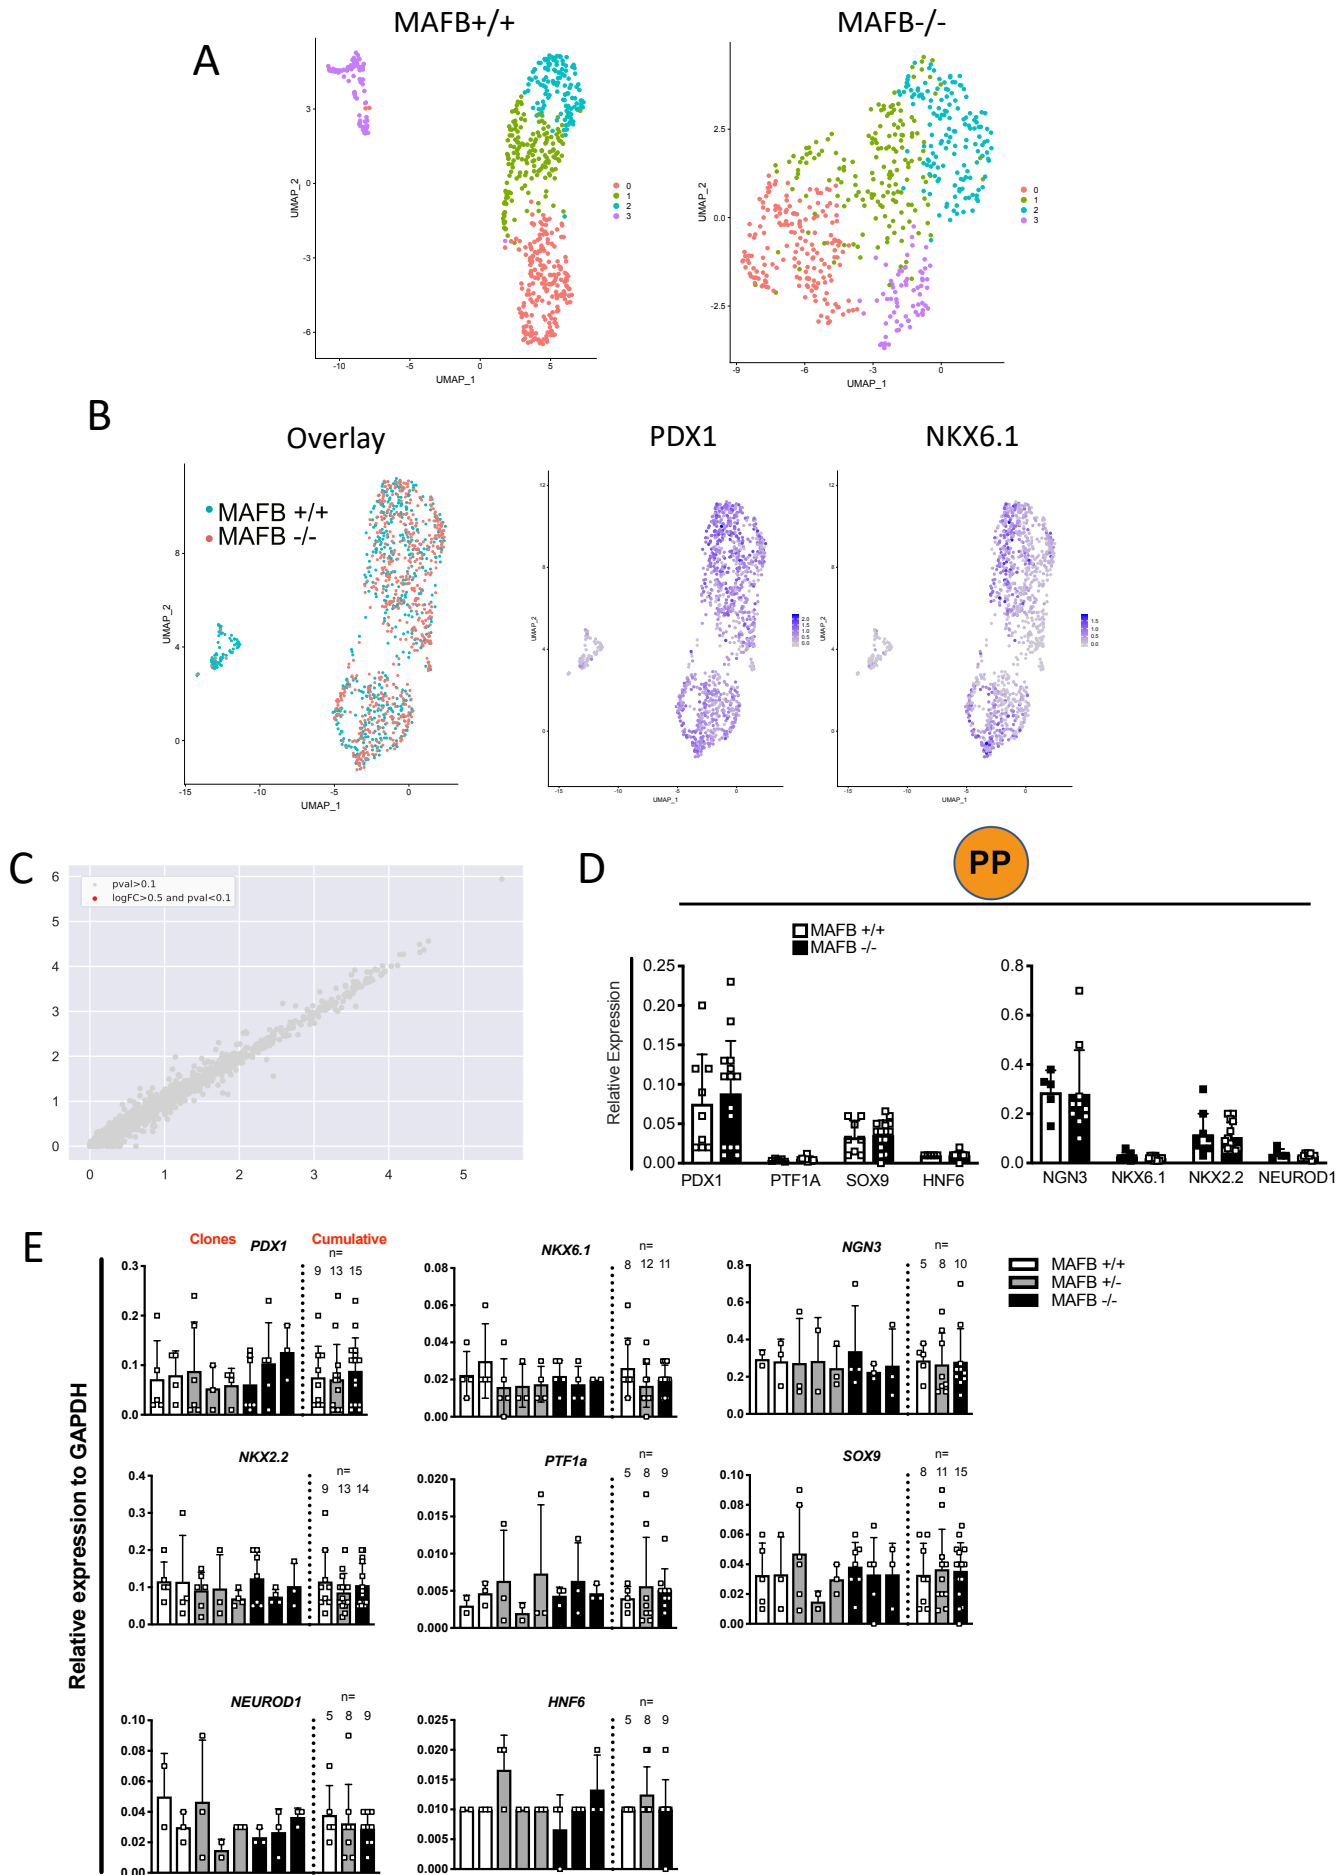



**Supplementary Figure 5. scRNA sequencing reveals MAFB<sup>-/-</sup> generate Pancreatic Progenitor cells in equivalent manner to MAFB<sup>+/+</sup> cells.**

(A) UMAP plot of MAFB <sup>+/+</sup> and <sup>-/-</sup> cells at the PP stage of differentiation, color-coded by cell populations.

(B) UMAP projections of the integrated analysis of MAFB <sup>+/+</sup> and <sup>-/-</sup> cells at the PP stage, color-coded by genotype (left) and normalized PDX1 and NKX6.1 expression (middle, right).

(C) Scatter plot showing the average gene expression (log scale) for MAFB <sup>+/+</sup> and <sup>-/-</sup> cells at the PP cell stage. No genes are significantly differentially expressed (log fold change >0.5, adjusted p value < 0.1) between MAFB <sup>+/+</sup> and <sup>-/-</sup> cells. P value calculated with MAST test.

(D) The relative mRNA expression patterns in MAFB <sup>+/+</sup> and <sup>-/-</sup> cells of designated genes for pan-pancreatic (*PDX1*, *PTF1A*, *SOX9* and *HNF6*) or pro-endocrine (*NGN3*, *NKX6.1*, *NKX2.2* and *NEUROD1*) at the PP stage as measured by quantitative PCR analysis. Each data point represents an independent biological sample.

(E) The mRNA expression patterns of designated genes for individual clones for pancreatic (*PDX1*, *PTF1A*, *SOX9* and *HNF6*) or pro-endocrine genes (*NGN3*, *NKX6.1*, *NKX2.2* and *NEUROD1*) at the PP stage as measured by quantitative PCR analysis. Each data point represents an independent biological sample.

P values by unpaired two-tailed t-test were \*P < 0.05, \*\*P < 0.01, \*\*\*P < 0.001, \*\*\*\*P < 0.0001. Data are presented as individual biological replicates and represent the mean ± SD.

# Supplementary Figure 6

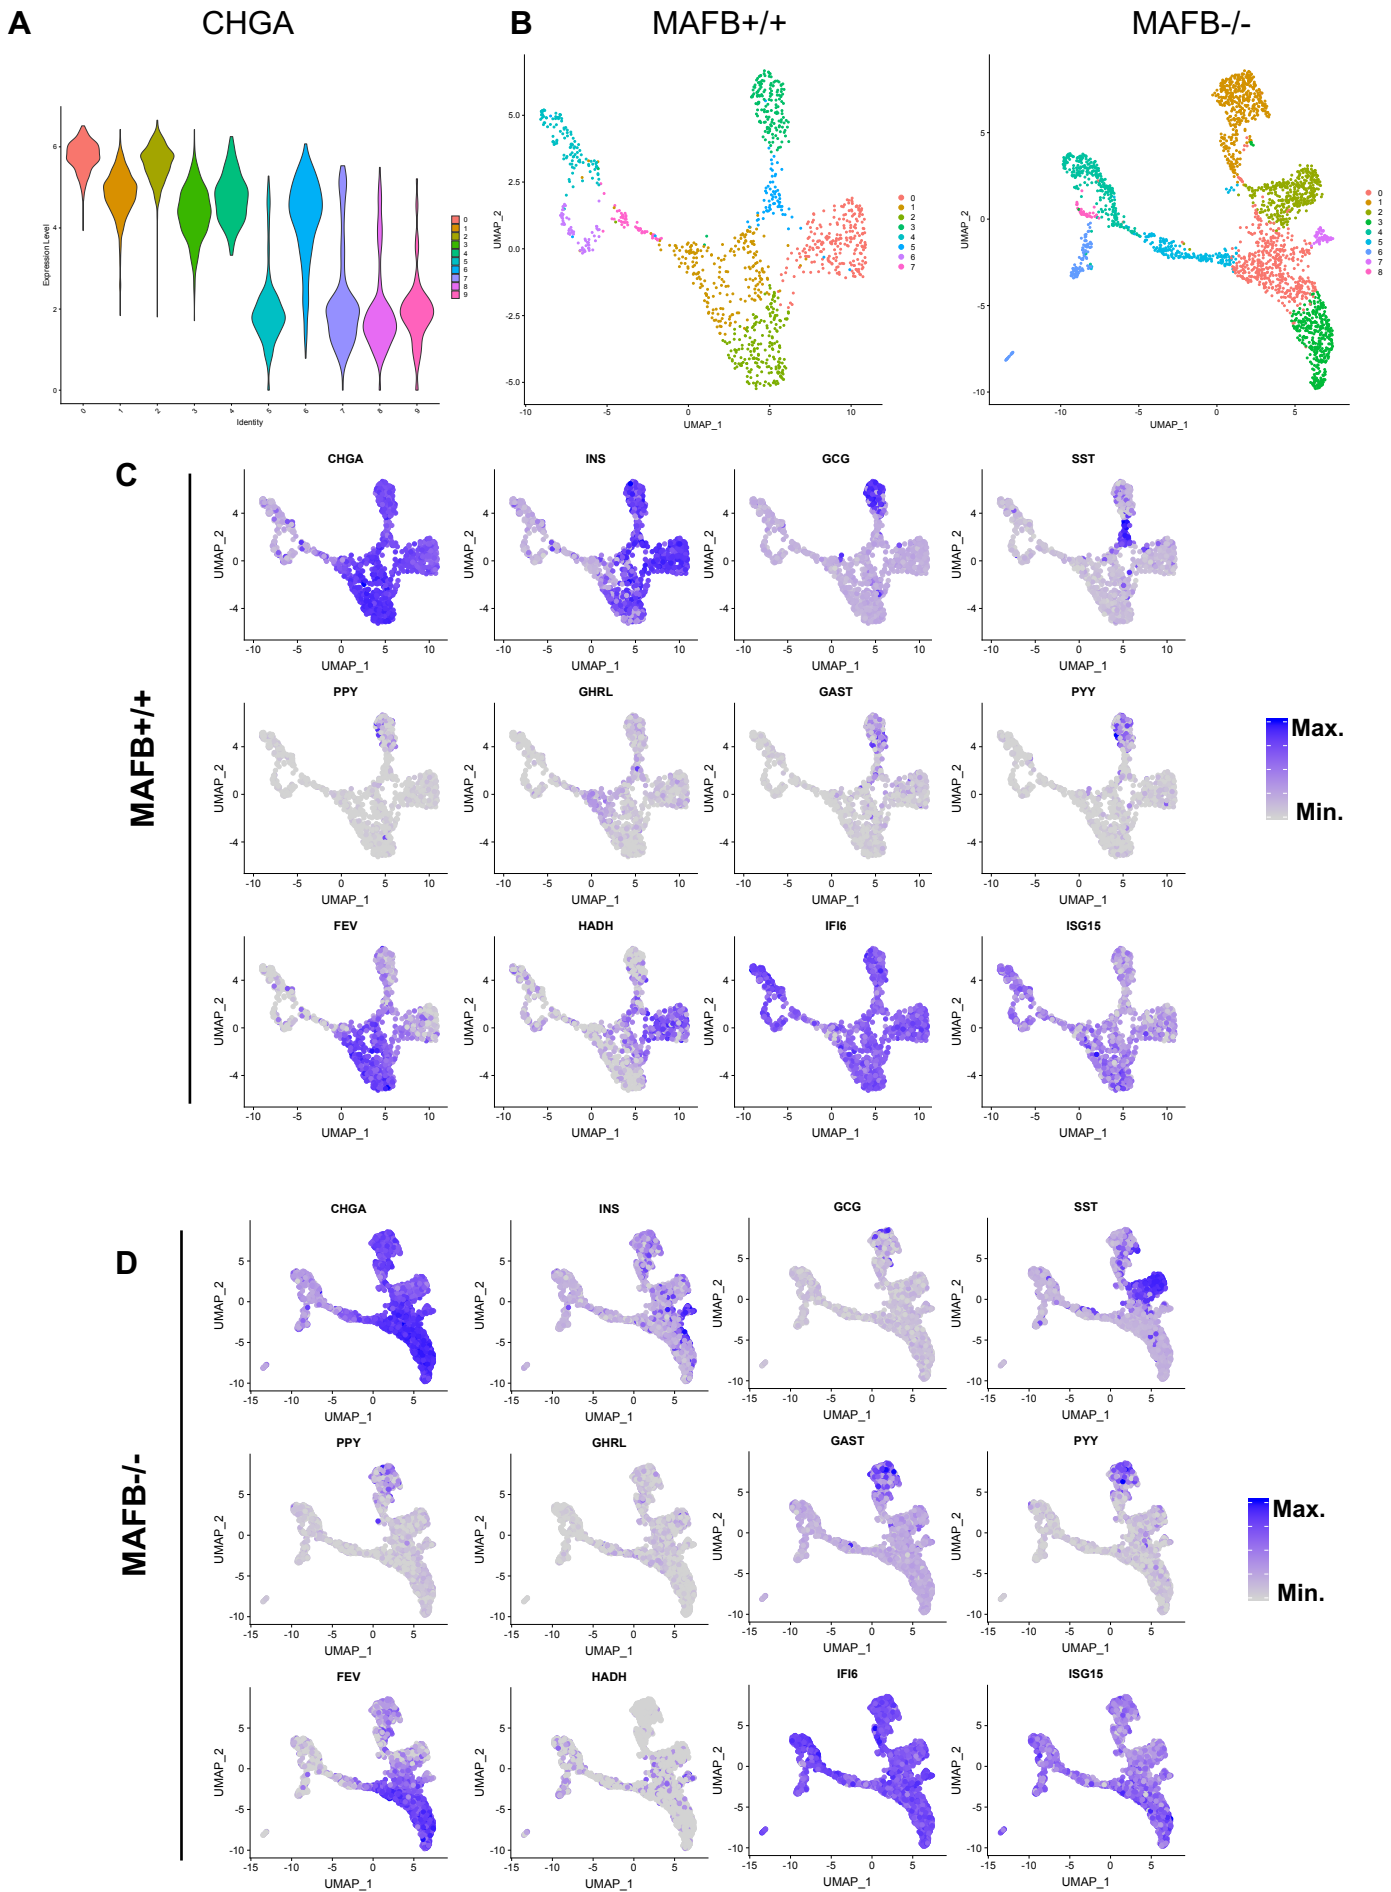

**Supplementary Figure 6. scRNA sequencing reveals MAFB regulates endocrine cell lineage commitment.**

(A) Violin plot of CHGA gene expression (normalized) in the merged MAFB +/+ and -/- cells from **Figure 4A**, color-coded by cell populations.

(B) UMAP plot of MAFB +/+ and -/- cells at the  $\beta$ -like cell stage of differentiation color-coded by cell identity.

(C,D) UMAP visualization of the log-transformed, normalized expression of selected genes at the  $\beta$ -like cell stage of differentiation in (C) MAFB+/+ and (D) MAFB-/- cells.

# Supplementary Figure 7

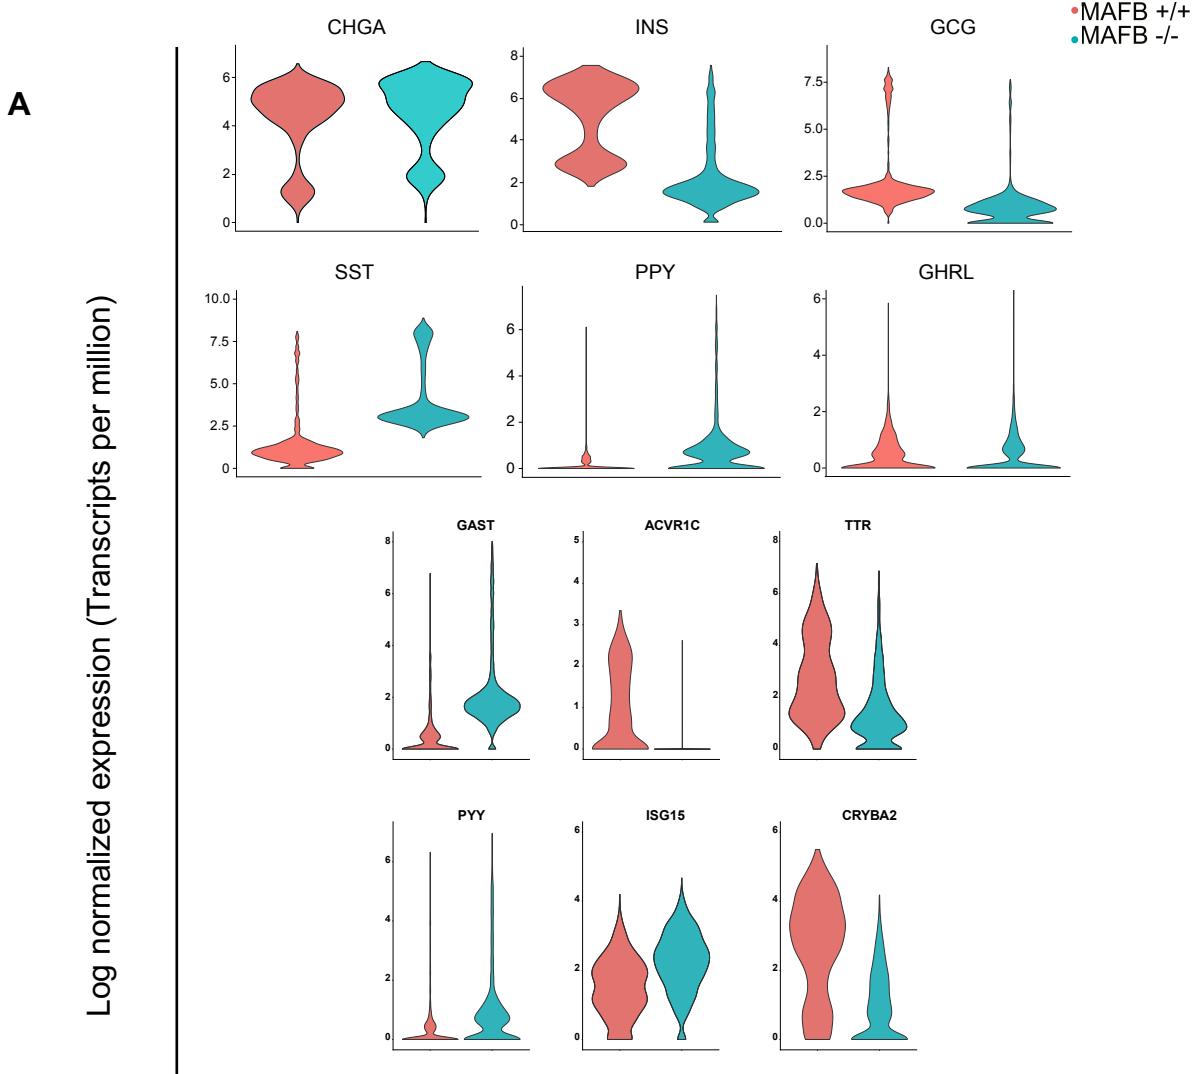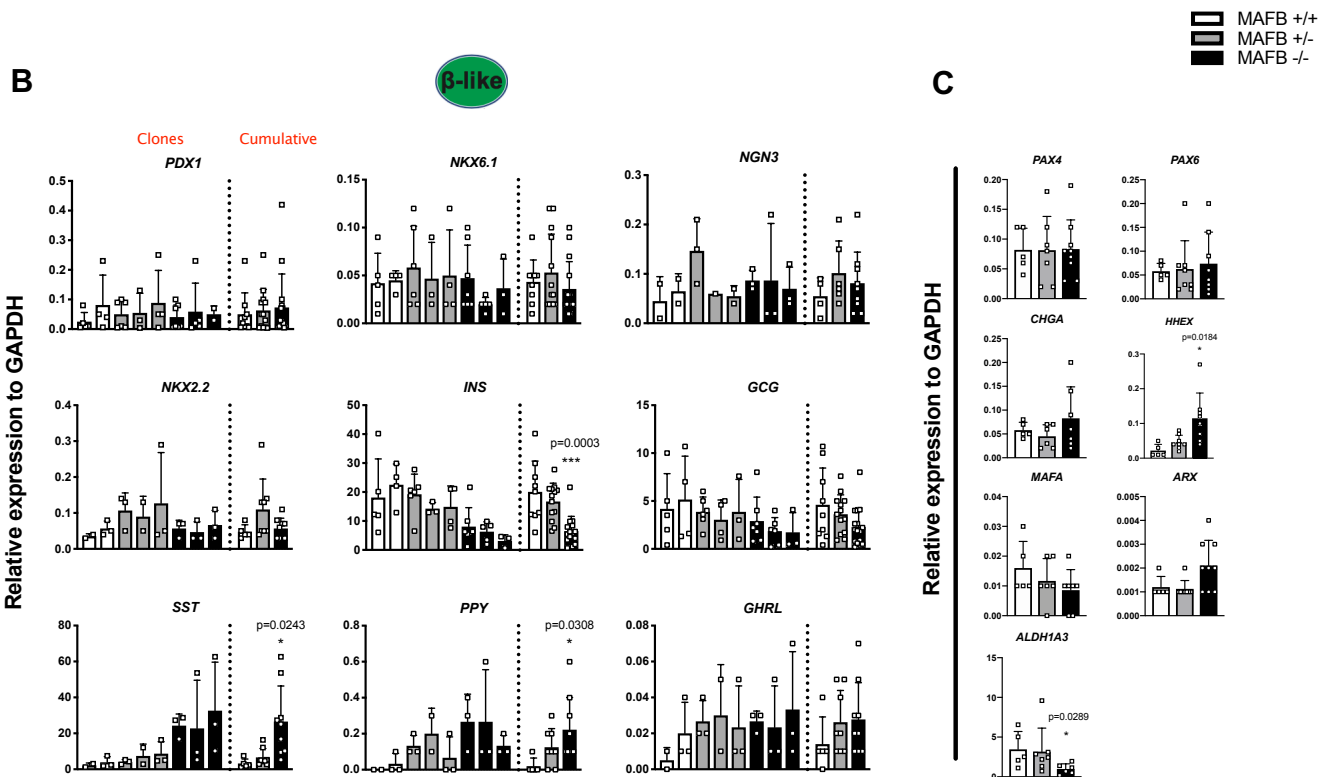

**Supplementary Figure 7. MAFB regulates endocrine hormone producing-cell lineage commitment.**

(A) Violin plot showing the expression of the top 5 genes and that are differentially expressed (Up and down regulated; fold change > 0.5, adjusted p value < 0.1) between MAFB +/+ and -/- cells in the  $\beta$ -like cell stage as well as the control endocrine genes *CHGA* and *GHRL*.

(B) The mRNA expression patterns of designated genes for individual clones for pro-endocrine (*NGN3*, *NKX6.1*, *NKX2.2* and *NEUROD1*) stages and islet hormones (*INS*, *GCG*, *SST*, *PPY* and *GHRL*) at the  $\beta$ -like cell stage as measured by quantitative PCR analysis. Each data point represents an independent biological sample.

(C) The mRNA expression patterns of genes implicated in endocrine cell fate (*PAX4*, *PAX6*, *HHEX*, *ARX*, *CHGA* and *MAFA*) as well as the  $\beta$ -cell de-differentiation marker *ALDH1A3* at the the  $\beta$ -like cell stage as measured by quantitative PCR analysis. Each data point represents an independent biological sample.

P values by unpaired two-tailed t-test were \*P < 0.05, \*\*P < 0.01, \*\*\*P < 0.001, \*\*\*\*P < 0.0001. Data are presented as individual biological replicates and represent the mean  $\pm$  SD.

# Supplementary Figure 8

## Top 5 downregulated genes

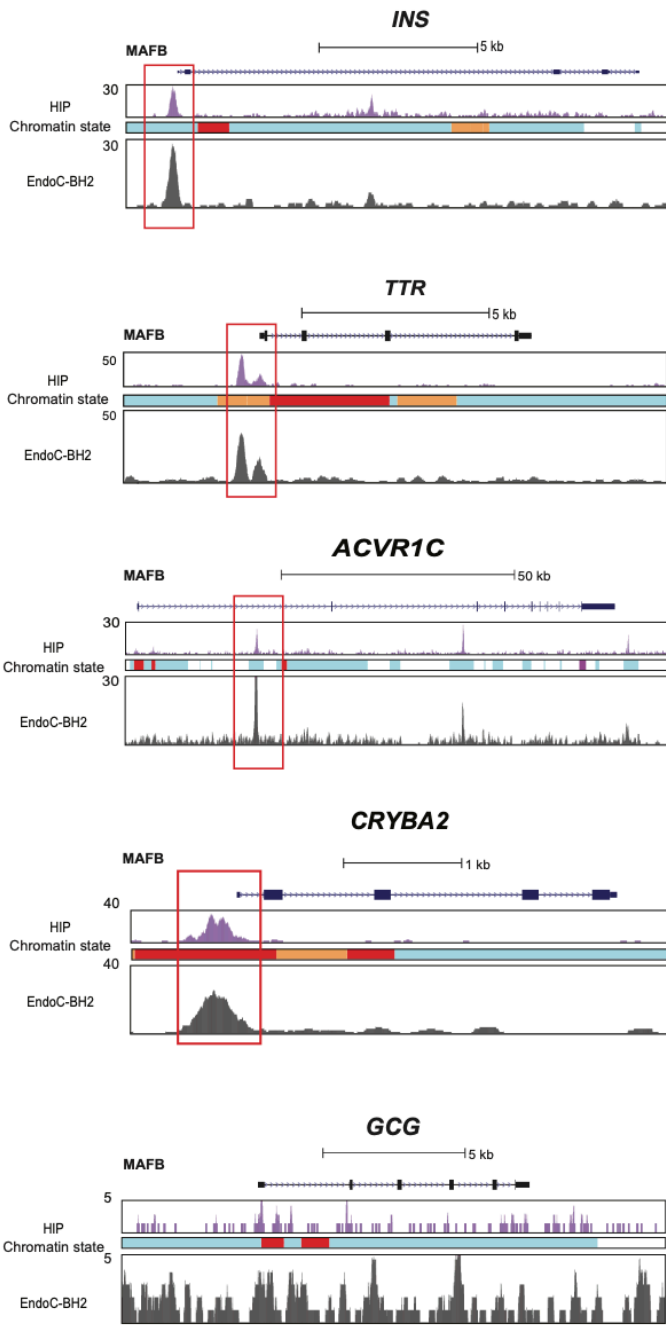

## Top 5 upregulated genes

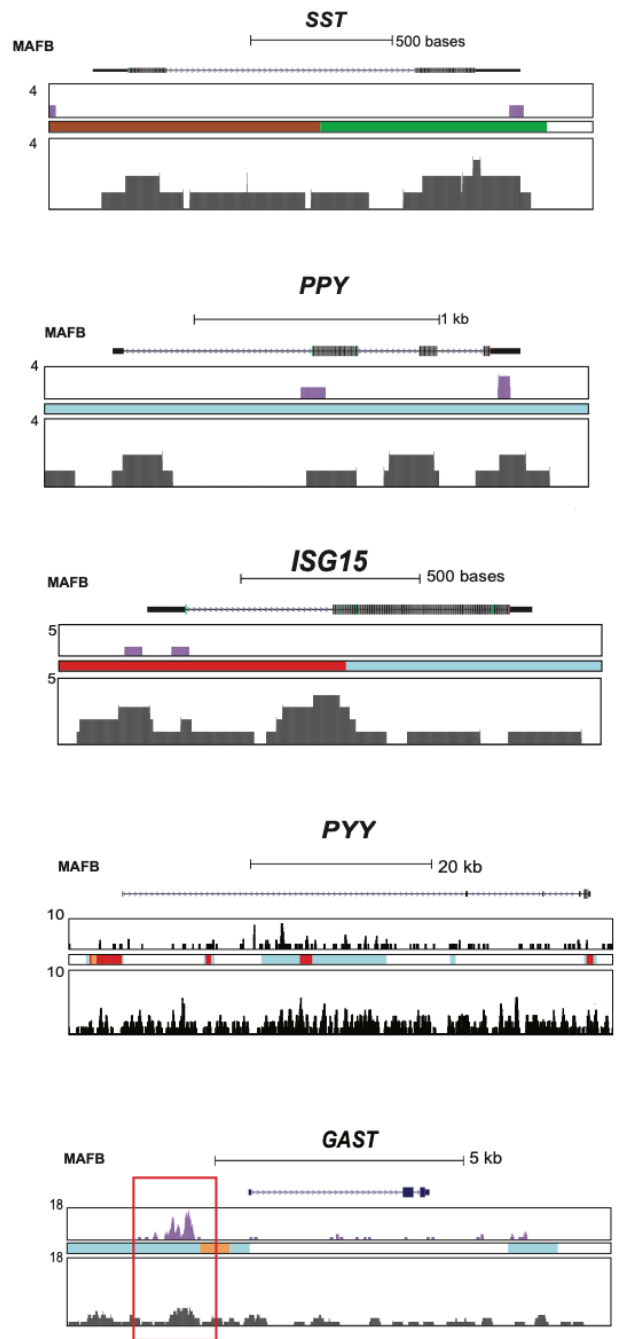

### Supplementary Figure 8. MAFB occupies $\alpha$ - and $\beta$ -cell specific genes.

ChIP-seq binding profiles for MAFB at the indicated *gene loci* in Human Islet Pancreas<sup>1,2</sup> and EndoC-BH2 cells. Tracks are set to the same scale for HIP and EndoC-BH2 cells per gene and the lengths of genes and direction of transcription are indicated by blue arrows. The top 5 up- and down-regulated genes identified in our MAFB +/+ and -/-  $\beta$ -cell differentiations in **Figure 4B** are outlined.

# Supplementary Figure 9

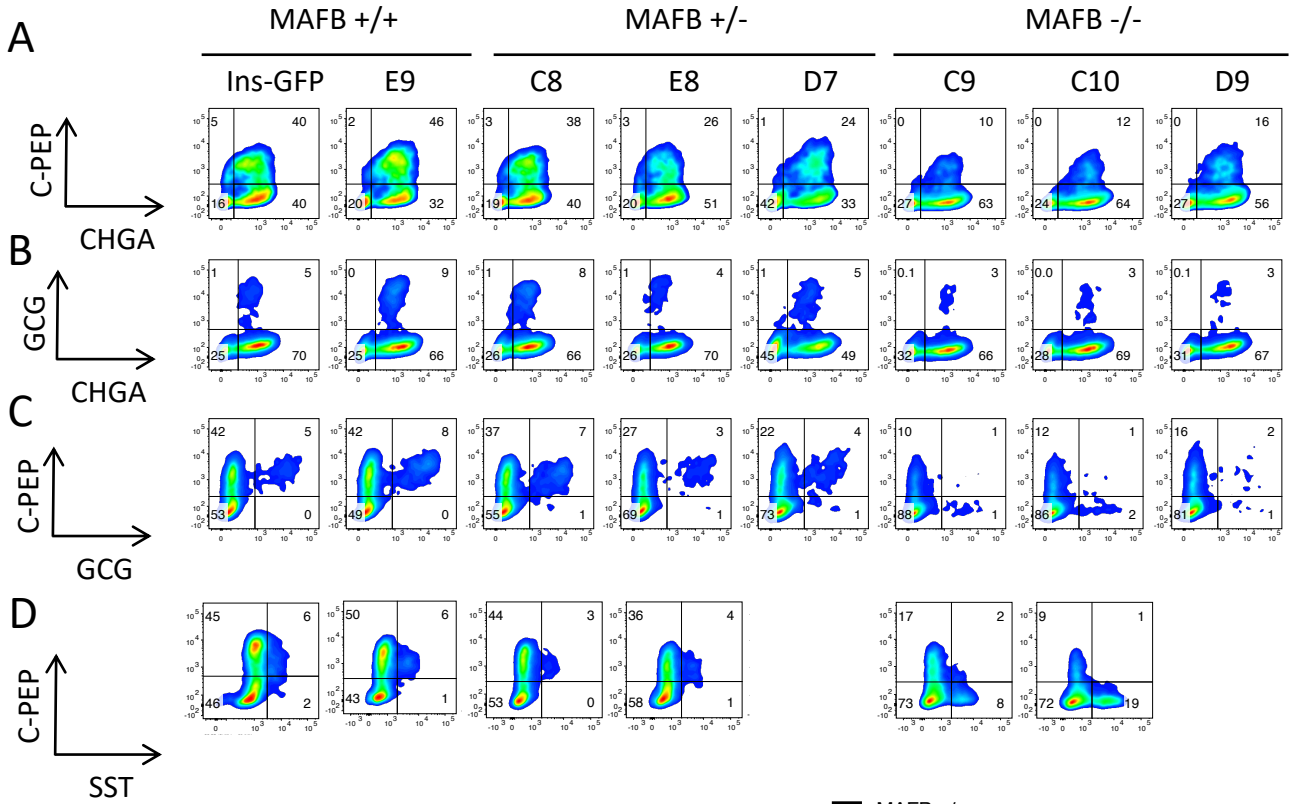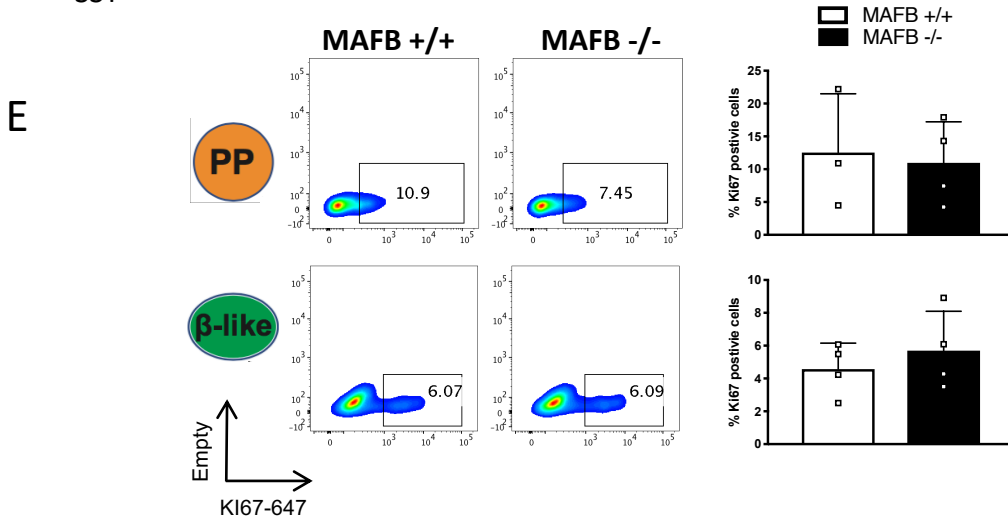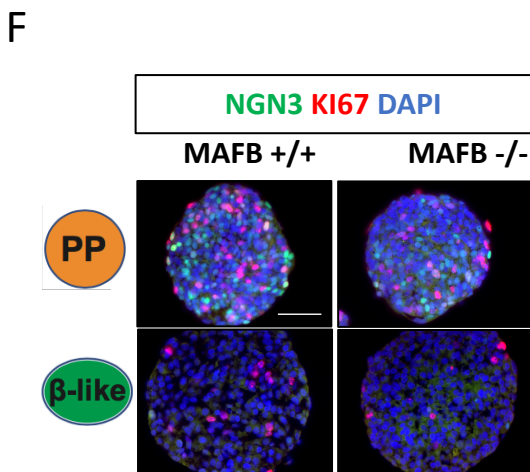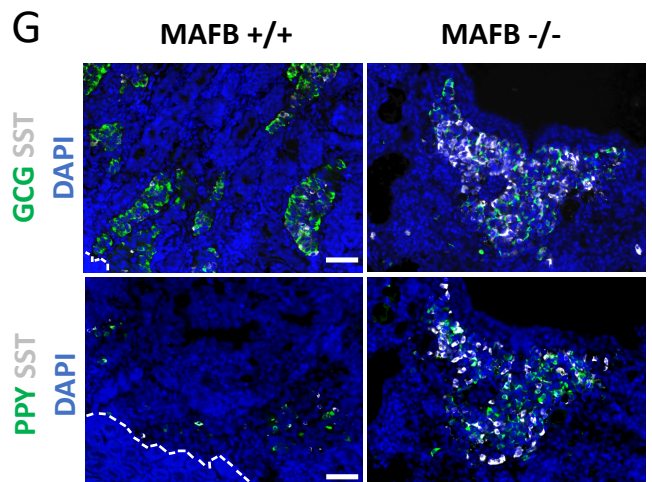

**Supplementary Figure 9. MAFB regulates differentiation of islet-hormone producing cell types.**

(A) Representative FC plots depicting the percentages of C-PEP+ CHGA+ cells for individual clones at the  $\beta$ -like cell stage.

(B) Representative FC plots depicting the percentages of CHGA+ GCG+ cells for individual clones at the  $\beta$ -like cell stage.

(C) Representative FC plots depicting the percentages of C-PEP+ GCG+ cells for individual clones at the  $\beta$ -like cell stage.

(D) Representative FC plots depicting the percentages of C-PEP+ SST+ cells for individual clones at the  $\beta$ -like cell stage.

(E) Representative FC plots depicting the percentages of KI67+ cells at the PP and  $\beta$ -cell stage and respective quantification (n=3).

(F) Representative IF images from 3 independent experiments of MAFB +/+ and -/- cells at the PP and  $\beta$ -cell stage depicting NGN3, KI-67 and DAPI. Scale bars, 50  $\mu$ m.

(G) Representative IF images from 6 independent animals (3 MAFB+/+ and 3 MAFB-/-) for SST co-staining with GCG (upper panel) and PPY (lower panel) of grafts removed from kidney capsules 8 weeks post-transplantation of MAFB +/+ and -/- cells. The graft is delineated and marked from the kidney using dashed lines where indicated. Scale bars, 50  $\mu$ m.



# Supplementary Figure 10

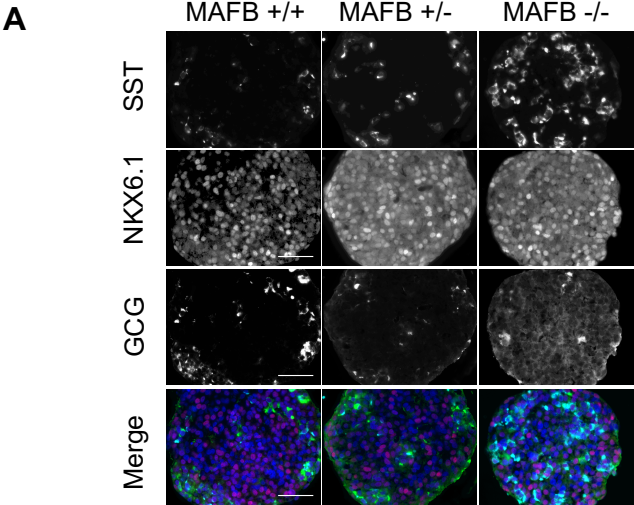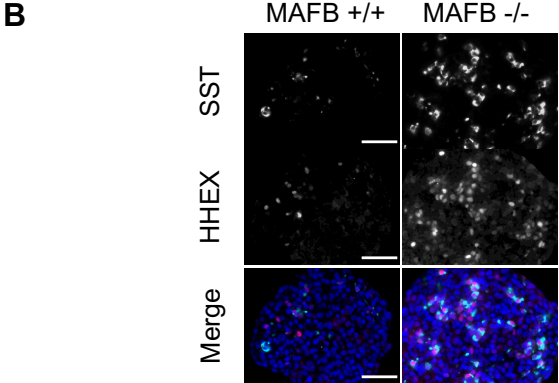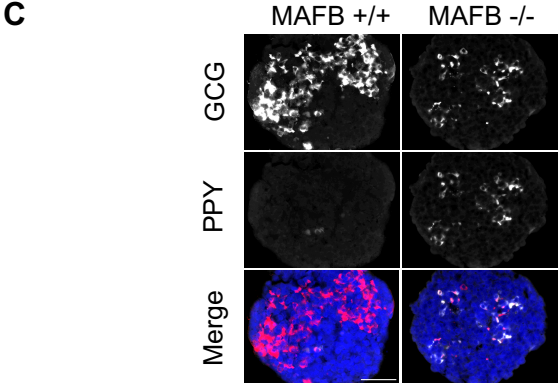

**Supplementary Figure 10. MAFB directs Pancreatic Endocrine cell lineage specification.**

(A) Representative IF images from 3 independent experiments the  $\beta$ -cell stage of differentiation depicting GCG, SST, NKX6.1 and DAPI. Scale bars, 50  $\mu$ m.

(B) Representative IF images from 3 independent experiments the  $\beta$ -like cell stage of differentiation depicting SST and HHEX and DAPI. Scale bars, 50  $\mu$ m.

(C) Representative IF images from 3 independent experiments the  $\beta$ -like cell stage of differentiation depicting PPY and GCG and DAPI. Scale bars, 50  $\mu$ m.

# Supplementary Figure 11

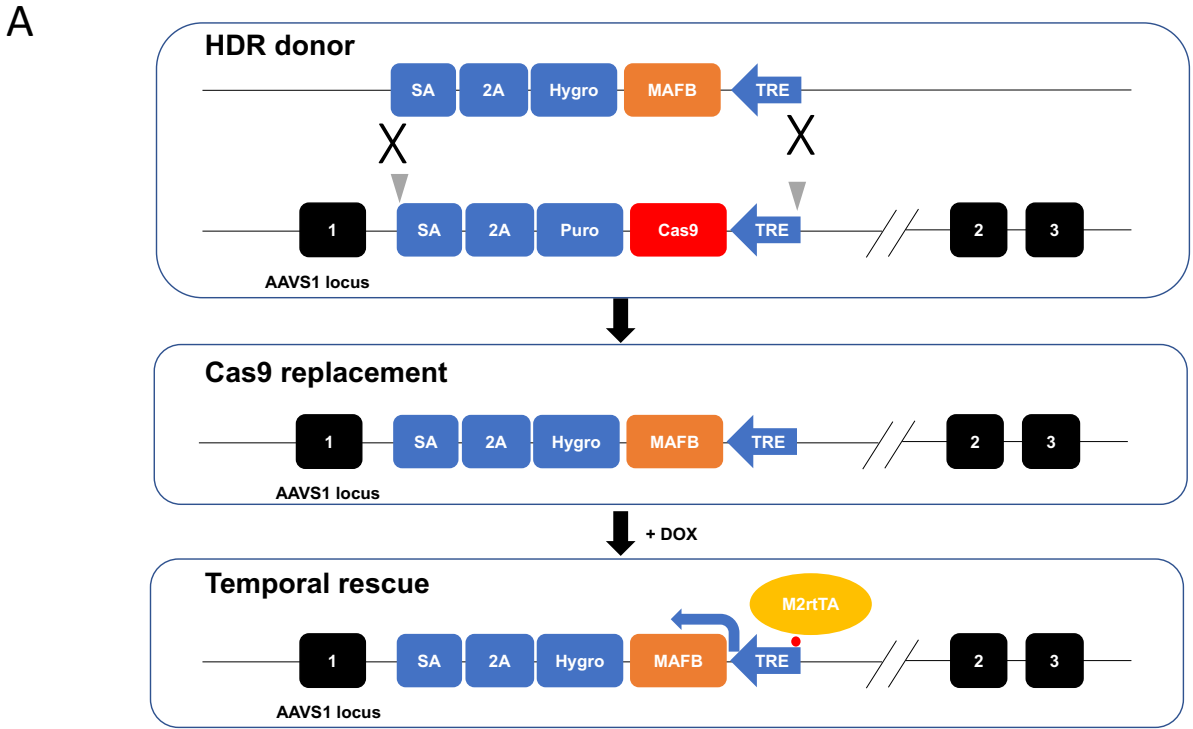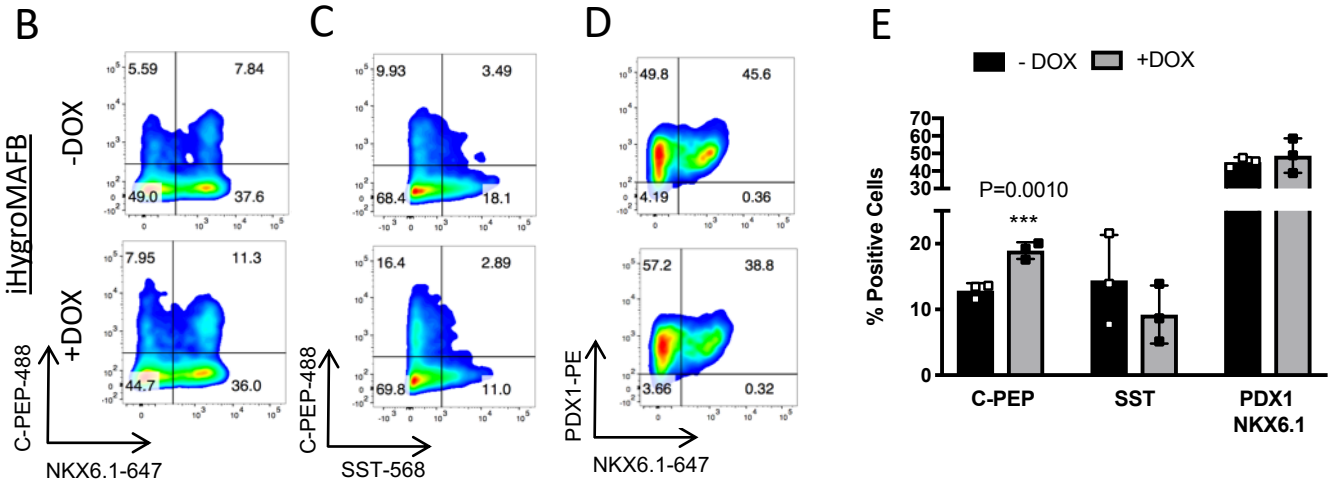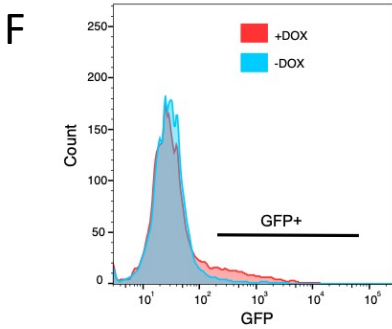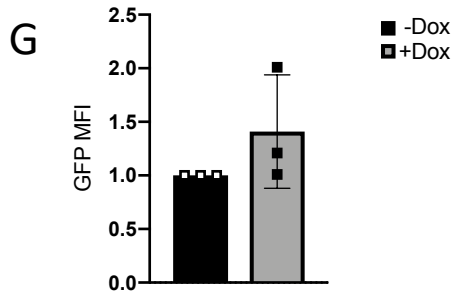

## Supplementary Figure 11. Rescue of MAFB in MAFB<sup>-/-</sup> cells.

(A) Schematic outlining gene rescue and temporal control of *MAFB* expression in *MAFB*<sup>-/-</sup> hESCs.

(B) Representative FC plots depicting the percentages of C-PEP<sup>+</sup> NKX6.1<sup>+</sup> cells at the  $\beta$ -cell stage.

(C) Representative FC plots depicting the percentages of C-PEP<sup>+</sup> SST<sup>+</sup> cells at the  $\beta$ -cell stage.

(D) Representative FC plots depicting the percentages of PDX1<sup>+</sup> NKX6.1<sup>+</sup> cells at the  $\beta$ -cell stage.

(E) Quantification of data from B,C,D (n = 3).

(F) Representative histograms and (G) Mean fluorescence intensity (MFI) of the GFP positive population in -DOX and +DOX treated cells (n = 3).

P values by paired two-tailed t-test were \*P < 0.05, \*\*P < 0.01, \*\*\*P < 0.001, \*\*\*\*P < 0.0001. Data are presented as individual biological replicates and represent the mean  $\pm$  SD.

# Supplementary Figure 12

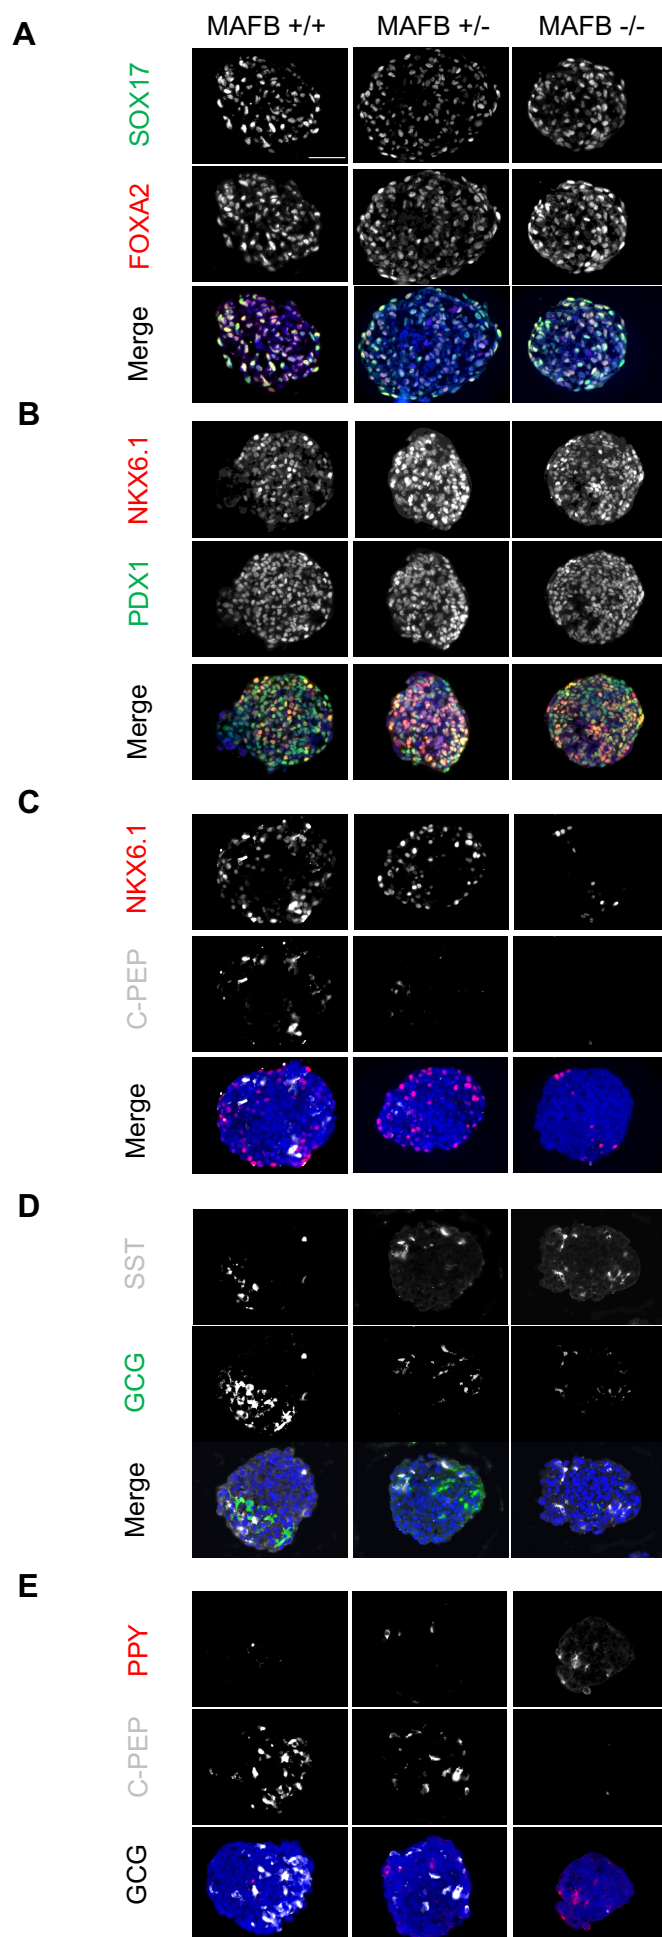

**Supplementary Figure 12. MAFB is critical to  $\beta$ -cell identity.**

(A – E) Representative IF images from 3 independent experiments at the DE, PP and  $\beta$ -like cell stages of differentiation for the respective markers as indicated. Scale bars, 50  $\mu$ m.

# Supplementary Figure 13

A

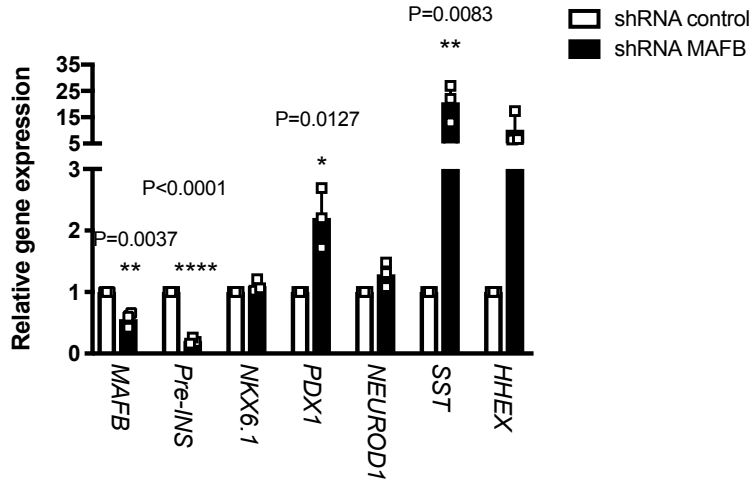

B

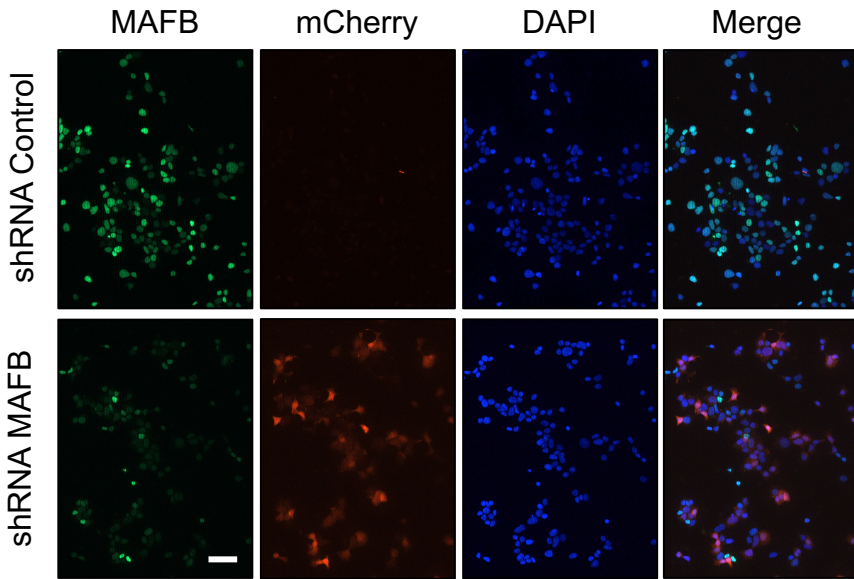

C

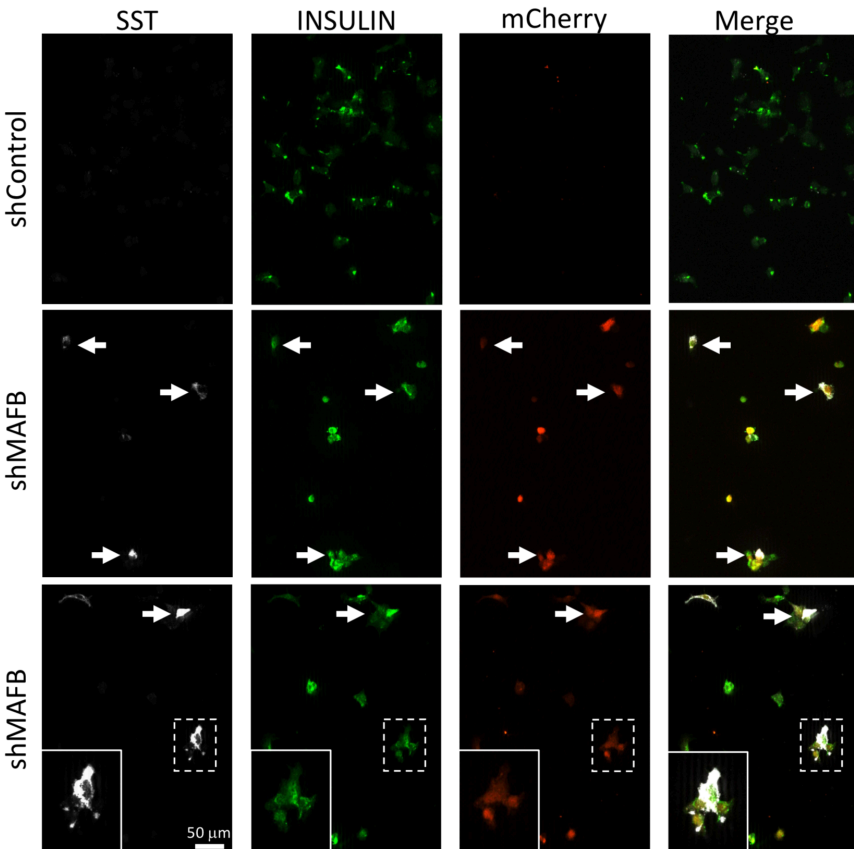

### **Supplementary Figure 13. MAFB is important for $\beta$ -cell identity in EndoC- $\beta$ H2 cells.**

(A) The mRNA expression patterns of indicated genes for pancreatic and islet cell subtypes in EndoC- $\beta$ H2 cells with shRNA control or MAFB knockdown as measured by quantitative PCR analysis (n=3).

(B) Representative IF images of EndoC- $\beta$ H2 cells with shRNA control or MAFB depicting MAFB, mCherry and DAPI one week post lentiviral transduction. Scale bars, 50  $\mu$ m.

(C) Representative IF images of EndoC- $\beta$ H2 cells with shRNA control or MAFB depicting SST, INS, mCherry/GFP and DAPI one week post lentiviral transduction. Scale bars, 50  $\mu$ m.

P values by paired two-tailed t-test were \*P < 0.05, \*\*P < 0.01, \*\*\*P < 0.001, \*\*\*\*P < 0.0001. Data are presented as individual biological replicates and represent the mean  $\pm$  SD.



# Supplementary Figure 14

**A**

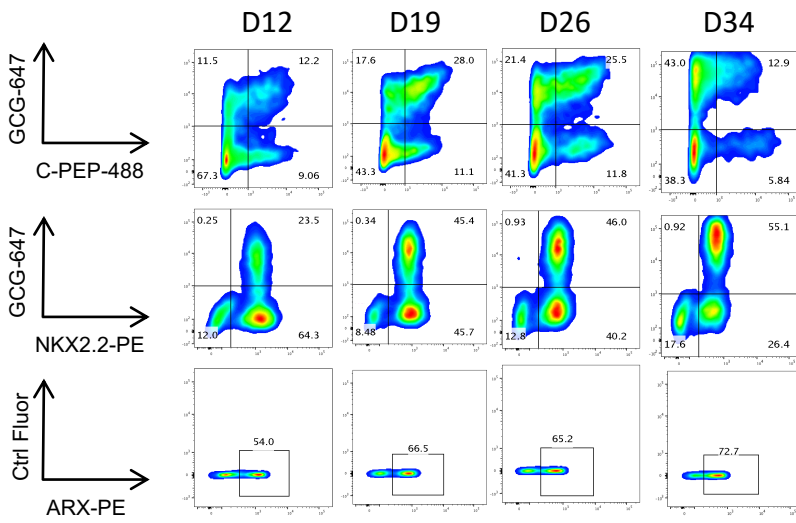

**B**

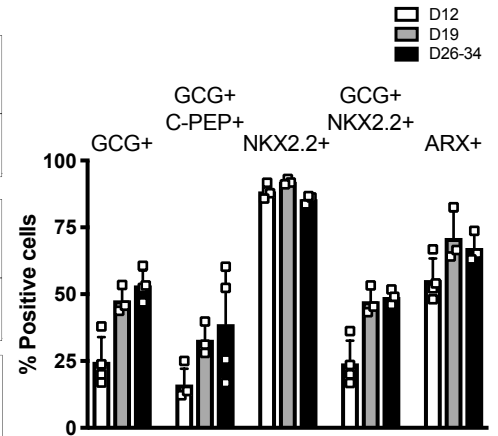

**C**

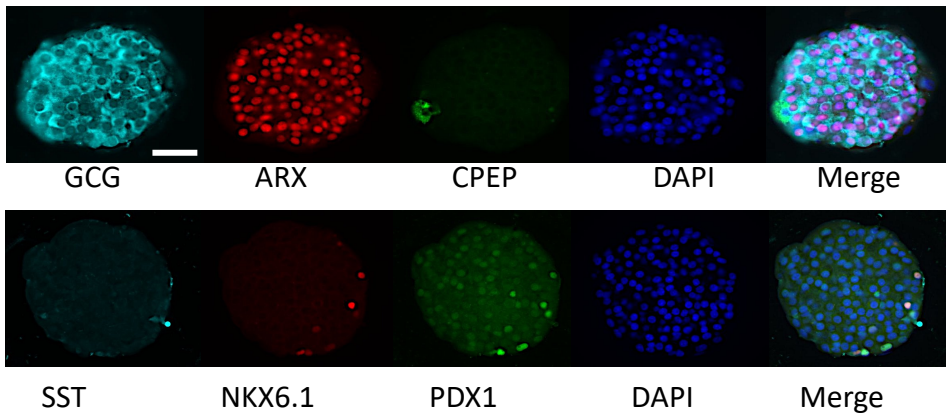

**D**

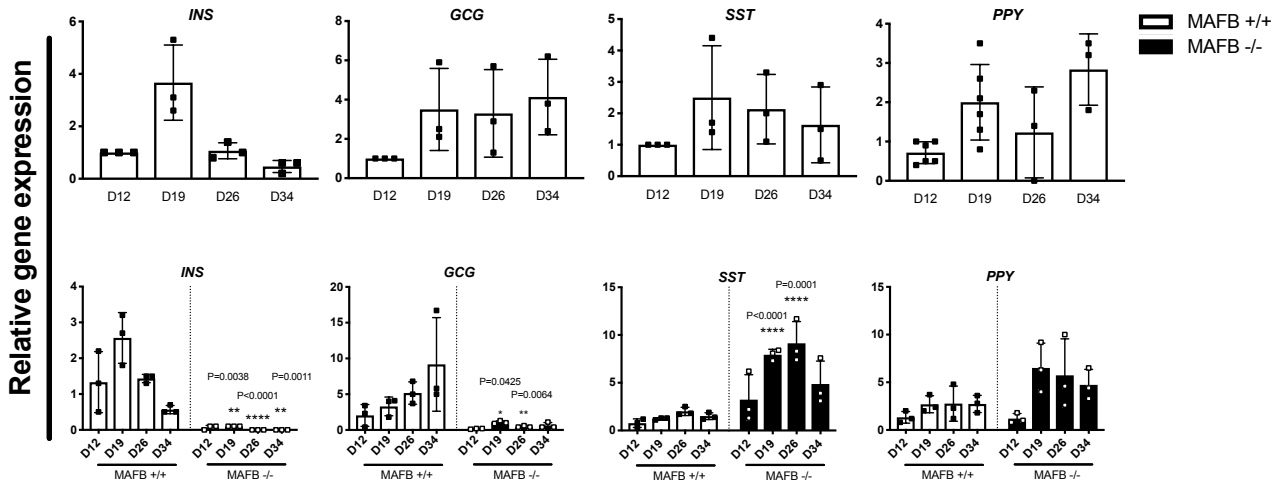

**Supplementary Figure 14. Characterization of human  $\alpha$ -cell differentiation from INS-GFP hESCs.**

(A) Representative FC plots depicting the percentages of GCG+ C-PEP+ cells, GCG+ NKX2.2+ and ARX+ cell at the indicated stages of  $\alpha$ -cell differentiation in INS-GFP cells.

(B) Quantification of FC data from A (n=3).

(C) Representative IF images from 3 independent experiments from differentiating  $\alpha$ -cells depicting GCG, INS and ARX (top panel) and SST, NKX6.1 and PDX1 (lower panel) at D26. Scale bars, 50  $\mu$ m.

(D) The mRNA expression patterns of islet hormones throughout  $\alpha$ -cell differentiation at the indicated timepoints as measured by quantitative PCR analysis. Top panel – parental INS-GFP cell line. Lower panel – MAFB +/+ and -/- differentiations. (n=3).

P values by paired two-tailed t-test were \*P < 0.05, \*\*P < 0.01, \*\*\*P < 0.001, \*\*\*\*P < 0.0001. Data are presented as individual biological replicates and represent the mean  $\pm$  SD.

# Supplementary Figure 15

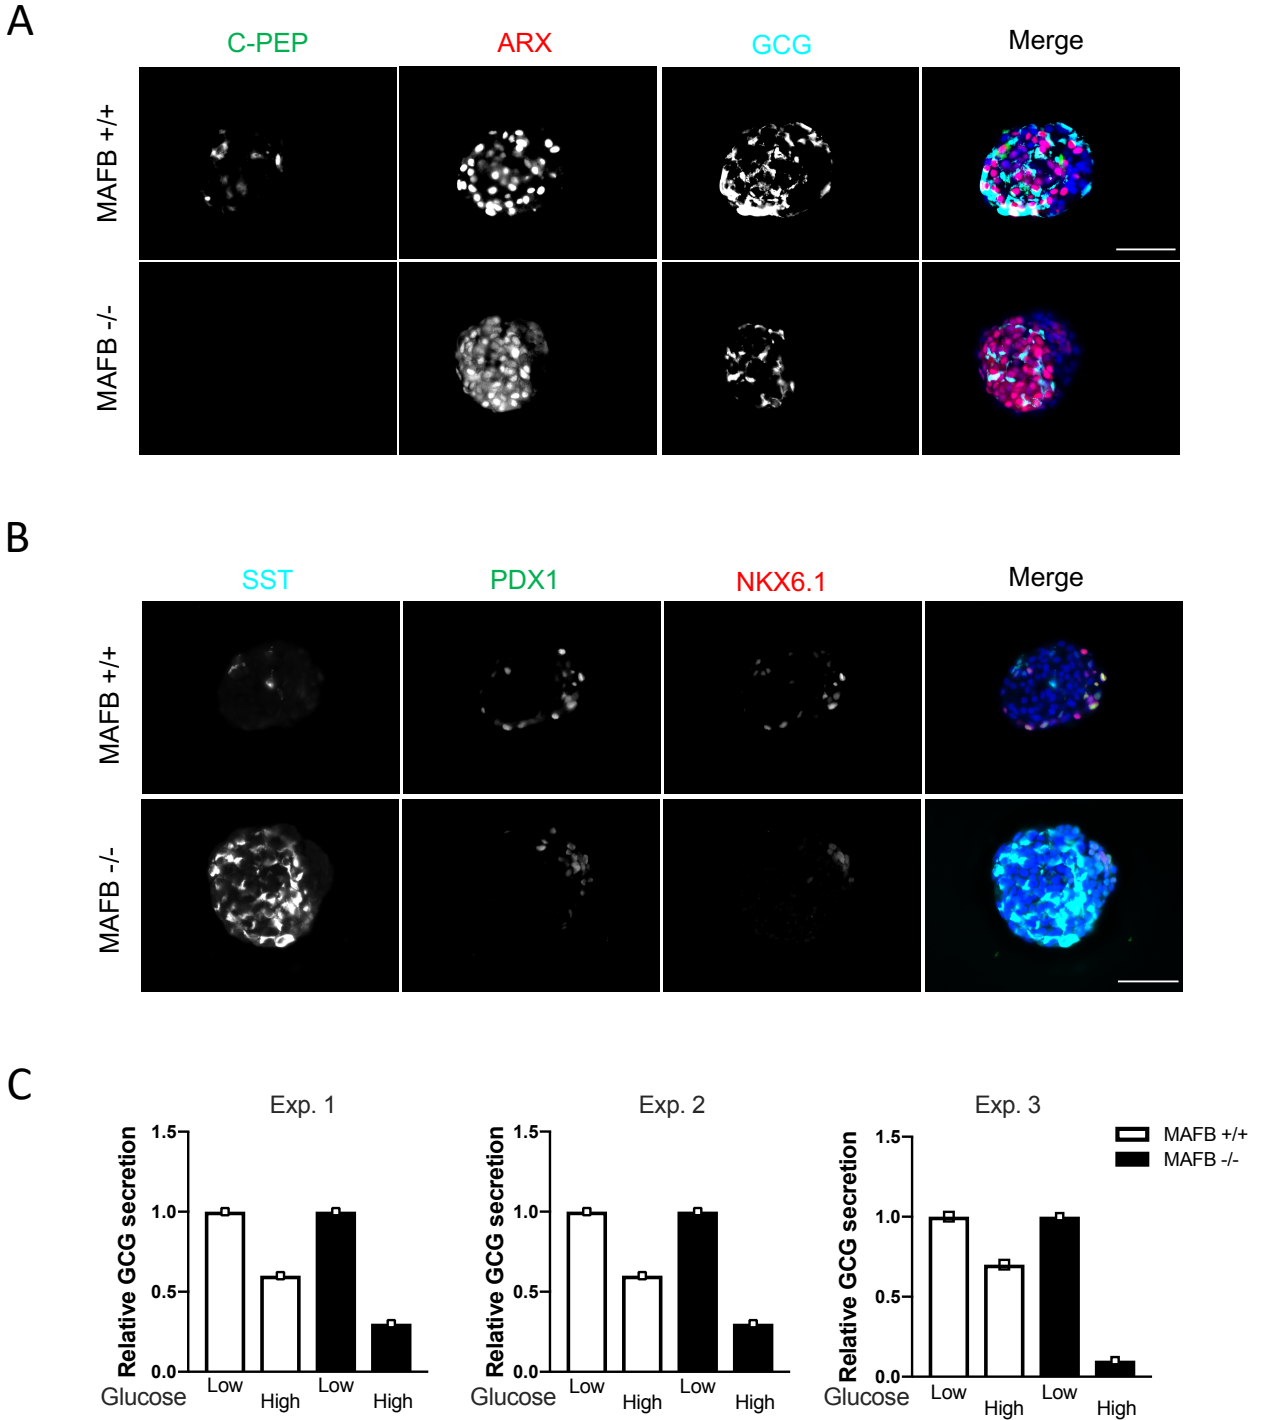

## Supplementary Figure 15. Loss of MAFB limits $\alpha$ -cell differentiation.

(A,B) Representative IF images from 3 independent experiments at the  $\alpha$ -cell stage depicting GCG, INS and ARX and PDX1, SST and NKX6.1 in d26  $\alpha$ -cells from MAFB +/+ and -/- differentiations. Scale bars, 50  $\mu$ m.

(C) Quantification of GCG secretion in response to low and high glucose from MAFB +/+ and -/- cells at d26-34 *in vitro*. 3 independent experiments are shown.

# Supplementary Figure 16

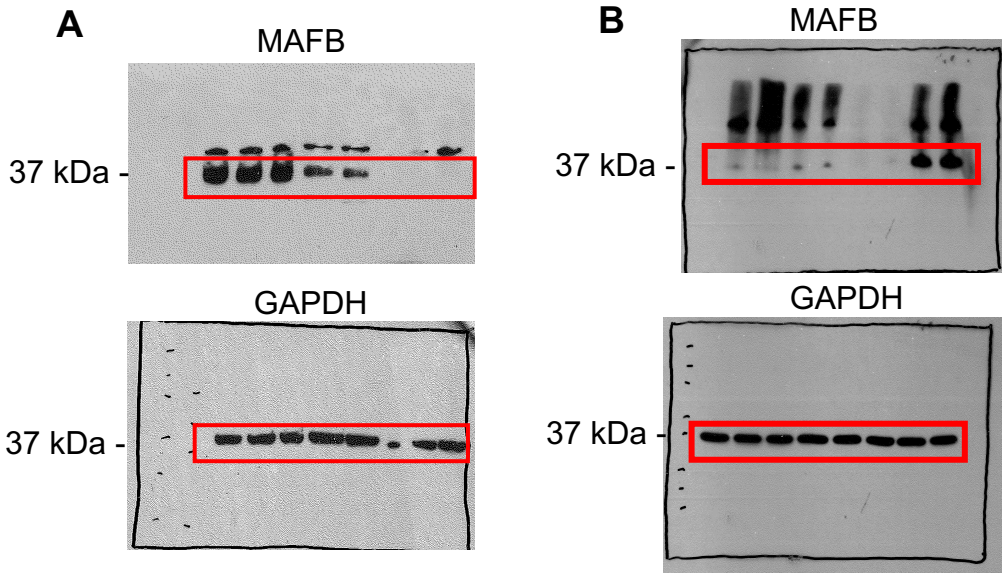

Uncropped immunoblots from Figure 1

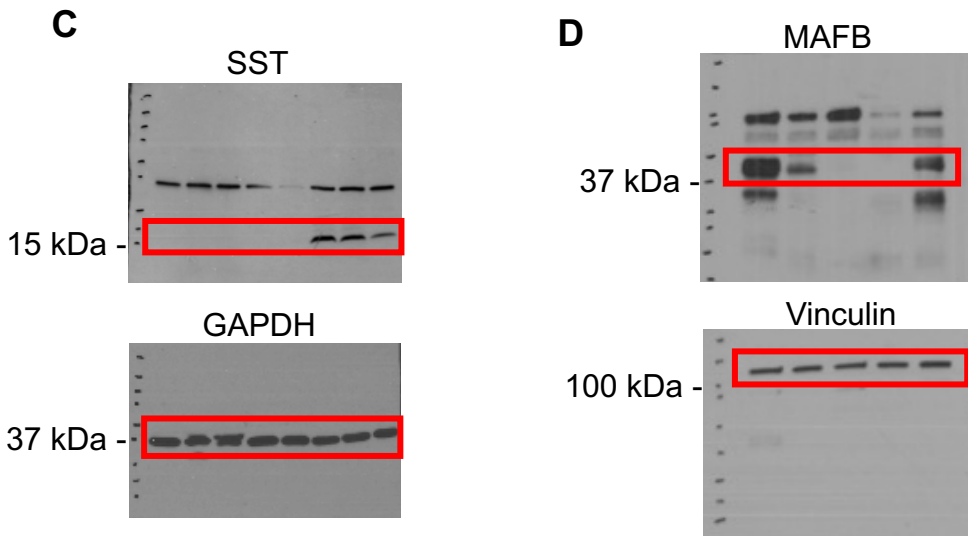

Uncropped immunoblots from Figure 4

Uncropped immunoblots from Figure 5

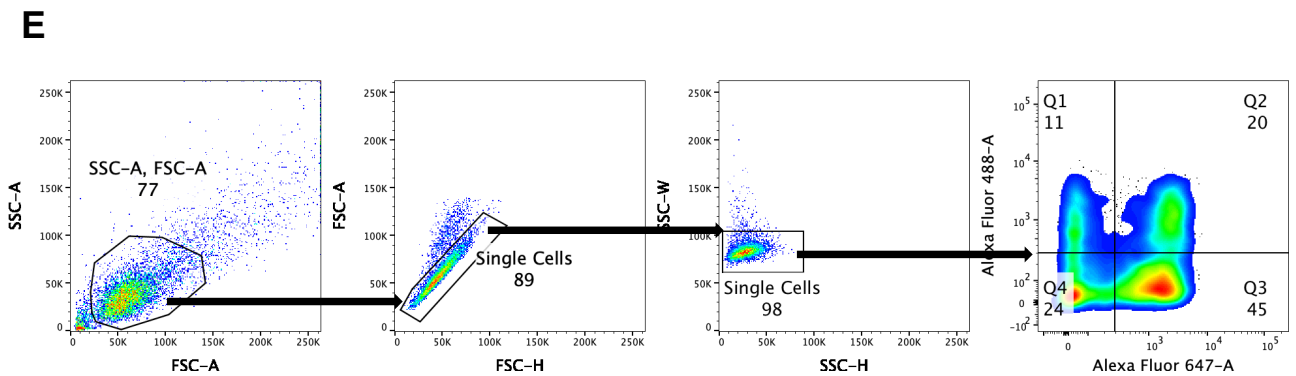

Gating Strategy for Flow Cytometry Analysis

## Supplementary Figure 16.

(A-D) Uncropped western blots.

(E) Flow Cytometry gating strategy.

## Supplementary References:

- 1 Pasquali, L. *et al.* Pancreatic islet enhancer clusters enriched in type 2 diabetes risk-associated variants. *Nat Genet* **46**, 136-143, doi:10.1038/ng.2870 (2014).
- 2 Mularoni, L., Ramos-Rodriguez, M. & Pasquali, L. The Pancreatic Islet Regulome Browser. *Front Genet* **8**, 13, doi:10.3389/fgene.2017.00013 (2017).

**Supplementary Table 1. hESC differentiation into  $\beta$ -like cells – Backbone Media Formulation**

| <b>Day</b> | <b>Media components</b> |            |            |                      |        |
|------------|-------------------------|------------|------------|----------------------|--------|
| D0         | DMEM/F-12               | 1xGlutamax | 1xMEM-NEAA | 1x 2-Mercaptoethanol | 4% KSR |
| D1-5       | RPMI                    | 1xGlutamax |            |                      |        |
| D6-7       | DMEM                    | 1xGlutamax |            |                      |        |
| D8         | DMEM                    | 1xGlutamax |            |                      |        |
| D9-11      | DMEM                    | 1xGlutamax |            |                      |        |
| D12-20     | DMEM                    | 1xGlutamax |            |                      |        |

**Supplementary Table 2. hESC differentiation into  $\beta$ -like cells – Media components**

| Day    | Media                                                                                                            | Supplement                                        |                       |                         |                                |
|--------|------------------------------------------------------------------------------------------------------------------|---------------------------------------------------|-----------------------|-------------------------|--------------------------------|
| D0     | Seed hESCs 5.5 million cells/ well in 6 well plates with D0 media                                                |                                                   |                       |                         |                                |
|        | Day0                                                                                                             | HER $\beta$ 1<br>10ng/ml                          | Activin A<br>10ng/ml  | FGF-2<br>4.16ng/ml      |                                |
| D1     | Rinse cells with DPBS (w/o Ca <sup>2+</sup> , Mg <sup>2+</sup> ) for 5 min and added Day 1 differentiation media |                                                   |                       |                         |                                |
|        | Day 1                                                                                                            | FBS<br>0.2%                                       | Activin A<br>100ng/ml | ITS<br>0.02X            | Wnt-3a<br>50ng/ml              |
| D2     | Day 2                                                                                                            | FBS<br>0.2%                                       | Activin A<br>100ng/ml | ITS<br>0.05X            |                                |
| D3     | Day 3                                                                                                            | FBS<br>0.2%                                       | KGF<br>25ng/ml        | ITS<br>0.1X             | TGF- $\beta$ IV<br>2.5 $\mu$ M |
| D4-5   | Day 4-5                                                                                                          | FBS<br>0.2%                                       | KGF<br>25ng/ml        | ITS<br>0.1X             |                                |
| D6-7   | Day 6-7                                                                                                          | B27<br>1X                                         | TTNPB<br>3nM          |                         |                                |
| D8     | Day 8                                                                                                            | B27<br>1X                                         | TTNPB<br>3nM          | EGF<br>50ng/ml          |                                |
| D9-11  | Day 9-11                                                                                                         | B27<br>1X                                         | KGF<br>50ng/ml        | EGF<br>50ng/ml          |                                |
| D12-20 | Day 12-20                                                                                                        | B27 1X      N-acetyly L-cysteine 1mM      NEAA 1X |                       |                         |                                |
|        |                                                                                                                  | Heparin 10ug/ml                                   |                       | Zinc sulfate 10 $\mu$ M | Alk5i II 10uM                  |
|        |                                                                                                                  | T3 136ng/mL                                       |                       | LDN 500nM               | XXi 2 $\mu$ M                  |
|        |                                                                                                                  | Vitamin C 500 $\mu$ M                             |                       |                         |                                |

**Supplementary Table 3. CRISPR gRNA target sequences for targeting MAFB.**

| <b>Gene + guide no</b> | <b>gRNA Target sequence</b> | <b>PAM</b> |
|------------------------|-----------------------------|------------|
| MAFB gRNA_1            | GGTGTGTCTTCTGTTCCGGTC       | GGG        |
| MAFB gRNA_2            | TCTTCACGTCGAACTTGCGC        | AGG        |
| MAFB gRNA_3            | ACACGGAGTGCTGAGCGGTG        | TGG        |



**Supplementary Table 4. PCR and sequencing primers used for genotyping and sequencing**

| <b>Primer</b>    | <b>Sequence (5'to 3')</b> |
|------------------|---------------------------|
| MAFB Seq Forward | GTGGAGAGGCAAGCGGAG        |
| MAFB Seq Reverse | GGGTTTCATCTGCTGGTAGT      |

Supplementary Table 5. Clonal Cell line sequence information.

| Clone Name<br>INS-GFP cells | Allele 1                   | Allele 2                                                      | Mutation                          | MAFB |
|-----------------------------|----------------------------|---------------------------------------------------------------|-----------------------------------|------|
| E9                          | TACACGGAGTGCTGAGCGGTGTGG   | TACACGGAGTGCTGAGCGGTGTGG                                      | WT / WT                           | +/+  |
| C8                          | TACACGGAGTGCTGAGCGGTGTGG   | TACACGGAGTGCTGAGC TACACGGAGTGTGGAGCTACACGGAGCTACACGGA -GTGTGG | WT / 35bp insertion, 1bp deletion | +/-  |
| D7                          | TACACGGAGTGCTGAGCGGTGTGG   | TACACGGAGTGCTGAG -----                                        | WT / 11bp deletion                | +/-  |
| E8                          | TACACGGAGTGCTGAGCGGTGTGG   | TACACGGAGTGCTGAGCGG GTGTGG                                    | WT / 1bp insertion                | +/+  |
| C9                          | TACACGGAGTGCTGAG -----     | TACACGGAGTGCTGAGCGG GTGTGG                                    | 11 bp deletion / 1bp insertion    | -/-  |
| C10                         | TACACGGAGTGCTGAG -----     | TACACGGAGTG ----- TGTGG                                       | 10 bp deletion / 10 bp deletion   | -/-  |
| D9                          | TACACGGAGTGCTGAGCGG GTGTGG | TACACGGAGTGCTGAGCGG GTGTGG                                    | 1 bp insertion / 1 bp insertion   | -/-  |

| IPSCs | Mutation           | MAFB |
|-------|--------------------|------|
| WT    | WT / WT            | +/+  |
| Het   | WT / 1bp insertion | +/-  |
| KO    | -83bp / -83bp      | -/-  |

**Supplementary Table 6. Differentially Expressed genes from MAFB +/+ and -/- cells at the beta-like stage (P\_adj<0.1, FC>0.5)**

| <b>Upregulated</b>   | <b>Gene</b>   | <b>avg_logFC</b> | <b>p_val_adj</b> |
|----------------------|---------------|------------------|------------------|
| 1                    | GAST          | 2.316356715      | 5.47E-303        |
| 2                    | SST           | 2.041943535      | 3.41e-312        |
| 3                    | PPY           | 1.413802582      | 2.66E-86         |
| 4                    | PYY           | 0.855968146      | 5.21E-40         |
| 5                    | ISG15         | 0.708019373      | 2.08E-106        |
| 6                    | LY6E          | 0.70691153       | 1.69E-110        |
| 7                    | CGA           | 0.694610481      | 5.11E-26         |
| 8                    | TPPP3         | 0.687042188      | 2.92E-55         |
| 9                    | RGS4          | 0.677778669      | 6.87E-62         |
| 10                   | HSPA1B        | 0.669118669      | 6.82E-128        |
| 11                   | KCTD12        | 0.627579284      | 4.84E-73         |
| 12                   | FXD2          | 0.600230106      | 2.50E-15         |
| 13                   | APOC1         | 0.561225169      | 1.98E-50         |
| 14                   | CTSB          | 0.554216445      | 4.72E-66         |
| 15                   | HSPA1A        | 0.549208538      | 2.61E-62         |
| 16                   | TIMP3         | 0.53469464       | 5.92E-48         |
| <b>Downregulated</b> | <b>Gene</b>   | <b>avg_logFC</b> | <b>p_val_adj</b> |
| 1                    | GCG           | -2.014125141     | 2.97E-196        |
| 2                    | INS           | -1.934440177     | 0                |
| 3                    | CRYBA2        | -1.931697312     | 7.71E-270        |
| 4                    | TTR           | -1.227343372     | 4.19E-141        |
| 5                    | ACVR1C        | -1.202830614     | 8.46E-202        |
| 6                    | SLC30A8       | -0.964682775     | 3.13E-147        |
| 7                    | PPP1R1A       | -0.829768652     | 1.25E-177        |
| 8                    | MT1G          | -0.789324756     | 5.68E-20         |
| 9                    | PCP4          | -0.767236561     | 4.91E-23         |
| 10                   | STMN2         | -0.766230297     | 6.22E-121        |
| 11                   | NPTX2         | -0.688057809     | 6.09E-95         |
| 12                   | COL5A2        | -0.680313646     | 5.13E-49         |
| 13                   | MT2A          | -0.655040748     | 2.85E-09         |
| 14                   | HMGB3         | -0.641933516     | 2.24E-137        |
| 15                   | EPHX1         | -0.638270828     | 1.44E-161        |
| 16                   | HADH          | -0.638030748     | 8.31E-132        |
| 17                   | MT1X          | -0.601419028     | 3.06E-25         |
| 18                   | ERO1LB        | -0.596307901     | 7.24E-46         |
| 19                   | NEUROD1       | -0.574711197     | 3.39E-93         |
| 20                   | CRISPLD1      | -0.546023471     | 1.81E-74         |
| 21                   | NKX6-1        | -0.54402969      | 8.58E-86         |
| 22                   | GAL           | -0.537813148     | 2.19E-28         |
| 23                   | AIF1          | -0.536504473     | 1.62E-127        |
| 24                   | SLC7A8        | -0.536149322     | 1.43E-122        |
| 25                   | SNORA76       | -0.509134644     | 8.98E-136        |
| 26                   | RP11-788H18.1 | -0.504352542     | 5.51E-105        |



**Supplementary Table 8. Differentially Expressed genes from MAFB +/- and -/- cells in GCG PPY PYY GAST high (Alpha-like) cells at D20 (P\_adj<0.1, FC>0.5)**

| Upregulated          | gene       | avg_logFC  | p_val_adj  |
|----------------------|------------|------------|------------|
|                      | GAST       | 2.34845121 | 4.24E-33   |
|                      | SST        | 1.87687227 | 6.10E-44   |
|                      | APOC1      | 1.42598852 | 2.08E-34   |
|                      | PPY        | 1.39317369 | 9.42E-10   |
|                      | GHRL       | 1.20480579 | 1          |
|                      | TPPP3      | 1.19890362 | 3.37E-28   |
|                      | CALB2      | 1.0297454  | 4.96E-12   |
|                      | LY6E       | 1.02849752 | 9.55E-25   |
|                      | TIMP3      | 0.97653856 | 6.30E-21   |
|                      | VIM        | 0.94252217 | 2.57E-17   |
|                      | FXYD2      | 0.90341815 | 7.48E-06   |
|                      | MAFB       | 0.86993285 | 5.57E-33   |
|                      | PEG10      | 0.83442657 | 0.00310048 |
|                      | APOE       | 0.80874644 | 2.76E-25   |
|                      | RGS4       | 0.80821309 | 5.77E-24   |
|                      | ISG15      | 0.76157627 | 3.34E-21   |
|                      | LYZ        | 0.75428174 | 0.01653335 |
|                      | AMBP       | 0.75381568 | 1.68E-13   |
|                      | HSPA1B     | 0.73811796 | 1.77E-22   |
|                      | C10orf10   | 0.72203225 | 4.91E-07   |
|                      | NEAT1      | 0.7071935  | 7.69E-06   |
|                      | PYY        | 0.6740438  | 1          |
|                      | MLF1       | 0.67158036 | 3.98E-19   |
|                      | FOXJ1      | 0.66121597 | 3.15E-06   |
|                      | TMOD1      | 0.65144922 | 4.25E-22   |
|                      | BAMBI      | 0.64792289 | 6.78E-17   |
|                      | HSP90AA1   | 0.63034606 | 3.50E-29   |
|                      | C1orf192   | 0.59054142 | 8.24E-08   |
|                      | TDO2       | 0.58867598 | 0.00101285 |
|                      | PIFO       | 0.57029439 | 7.96E-13   |
|                      | TMX4       | 0.5698137  | 7.19E-11   |
|                      | HSPA1A     | 0.56574268 | 3.53E-10   |
|                      | DSP        | 0.55331361 | 1.13E-15   |
|                      | RGS9       | 0.55011204 | 3.41E-19   |
|                      | AGT        | 0.54569588 | 1.97E-05   |
|                      | GC         | 0.54338691 | 0.43178532 |
|                      | MDK        | 0.54269379 | 4.40E-12   |
|                      | SEZ6L      | 0.5424836  | 1.97E-19   |
|                      | RPL17      | 0.53597572 | 6.38E-29   |
|                      | MYO10      | 0.526973   | 6.49E-16   |
|                      | TXNDC12    | 0.52233686 | 3.75E-19   |
|                      | MYH10      | 0.51451642 | 1.90E-17   |
|                      | UBE2L6     | 0.514254   | 2.58E-18   |
|                      | C8orf4     | 0.51300744 | 1.17E-07   |
|                      | HEPACAM2   | 0.51253835 | 5.94E-12   |
|                      | DNAJB1     | 0.51086168 | 3.59E-15   |
|                      | EIF4A2     | 0.50786082 | 7.53E-26   |
|                      | SPTSSB     | 0.5016538  | 8.17E-09   |
| <b>Downregulated</b> | INS        | -2.6998144 | 5.21E-122  |
|                      | GCG        | -2.3085079 | 3.86E-73   |
|                      | CRYBA2     | -2.0366977 | 2.67E-113  |
|                      | APOA2      | -1.7674806 | 7.56E-31   |
|                      | ACVR1C     | -1.4741353 | 2.27E-72   |
|                      | EPHX1      | -1.0894711 | 9.60E-75   |
|                      | TTR        | -1.0717345 | 8.43E-31   |
|                      | SLC30A8    | -1.0484865 | 3.94E-49   |
|                      | PPP1R1A    | -0.8705498 | 3.16E-51   |
|                      | HMGB3      | -0.8705292 | 2.63E-31   |
|                      | ALDH1A1    | -0.8406196 | 3.10E-23   |
|                      | GAL        | -0.8321412 | 3.24E-07   |
|                      | PCSK2      | -0.8142138 | 4.87E-39   |
|                      | RP11-788H1 | -0.7751951 | 2.08E-30   |
|                      | STMN2      | -0.6887093 | 2.25E-24   |
|                      | AIF1       | -0.6817355 | 3.21E-35   |
|                      | SLC7A8     | -0.6718028 | 2.57E-43   |
|                      | SERPINI1   | -0.6313049 | 7.91E-23   |
|                      | MAN1A1     | -0.5520895 | 2.80E-16   |
|                      | C2CD4A     | -0.5212733 | 4.15E-19   |
|                      | MT-ATP6    | -0.5107123 | 4.85E-24   |
|                      | NPTX2      | -0.5058441 | 7.00E-27   |

**Supplementary Table 9. Differentially Expressed genes from MAFB +/- and -/- cells in SST HHEX high (Delta-like) cells at D20 (P\_adj<0.1, FC>0.5)**

| <b>Upregulated</b>   | <b>Gene</b> | <b>avg_logFC</b> | <b>p_val_adj</b> |
|----------------------|-------------|------------------|------------------|
|                      | PPY         | 1.16921263       | 0.00065802       |
|                      | TPPP3       | 0.94230623       | 4.95E-05         |
|                      | SST         | 0.83167127       | 3.23E-07         |
|                      | APOC1       | 0.7776412        | 0.00014862       |
|                      | MAFB        | 0.71361123       | 2.97E-07         |
|                      | APOE        | 0.70040977       | 1.17E-05         |
|                      | LY6E        | 0.6953392        | 0.00016574       |
|                      | ISG15       | 0.69312906       | 2.74E-05         |
|                      | PYY         | 0.6342115        | 0.00345824       |
|                      | C1orf192    | 0.56016347       | 0.01327972       |
|                      | IFI6        | 0.55576006       | 1.14E-11         |
| <b>Downregulated</b> | INS         | -2.8150699       | 3.58E-59         |
|                      | CRYBA2      | -2.2224018       | 4.01E-55         |
|                      | ACVR1C      | -1.3812356       | 3.03E-35         |
|                      | GCG         | -1.143319        | 4.24E-46         |
|                      | TTR         | -1.1143138       | 5.29E-20         |
|                      | EPHX1       | -1.0512858       | 5.57E-33         |
|                      | PPP1R1A     | -1.024554        | 1.87E-36         |
|                      | MT1X        | -0.9083369       | 0.00957171       |
|                      | HADH        | -0.8972487       | 2.75E-21         |
|                      | STMN2       | -0.8549379       | 5.11E-12         |
|                      | MAN1A1      | -0.8211267       | 3.64E-19         |
|                      | NEUROD1     | -0.8039444       | 1.83E-12         |
|                      | FABP5       | -0.7611367       | 1.93E-13         |
|                      | IGFBP5      | -0.7404403       | 7.73E-05         |
|                      | KRT19       | -0.7397835       | 2.47E-09         |
|                      | HMGB3       | -0.7186303       | 1.31E-11         |
|                      | ERO1LB      | -0.7150173       | 1.94E-09         |
|                      | C9orf16     | -0.6663357       | 7.60E-09         |
|                      | MT-ATP6     | -0.6039107       | 7.24E-15         |
|                      | PCSK2       | -0.5968298       | 1.43E-09         |
|                      | SLC30A8     | -0.5885128       | 4.54E-05         |
|                      | PLCE1       | -0.5561556       | 2.75E-11         |
|                      | FTL         | -0.5540723       | 2.65E-10         |
|                      | AIF1        | -0.5484026       | 4.55E-08         |
|                      | MT-ND2      | -0.5467455       | 3.56E-13         |
|                      | TUBB2B      | -0.5396288       | 1.38E-05         |
|                      | RPS21       | -0.5078175       | 6.78E-12         |
|                      | SNORA76     | -0.5072658       | 2.52E-07         |
|                      | IGFBP2      | -0.5026126       | 0.0011693        |
|                      | SLC7A8      | -0.5016193       | 6.41E-07         |

**Supplementary Table 10. hESC differentiation into  $\alpha$ -like cells – Media components**

| Day        | Media                                                                                                            | Supplement                                                                                                                                         |
|------------|------------------------------------------------------------------------------------------------------------------|----------------------------------------------------------------------------------------------------------------------------------------------------|
| D0         | Seed hESCs 5.5 million cells/ well in 6 well plates with D0 media                                                |                                                                                                                                                    |
|            | Day 0                                                                                                            | HER $\beta$ 1      Activin A      FGF-2<br>10ng/ml      10ng/ml      4.16ng/ml                                                                     |
| D1         | Rinse cells with DPBS (w/o Ca <sup>2+</sup> , Mg <sup>2+</sup> ) for 5 min and added Day 1 differentiation media |                                                                                                                                                    |
|            | Day 1                                                                                                            | FBS              Activin A              ITS              Wnt-3a<br>0.2%              100ng/ml              0.02X              50ng/ml              |
| D2         | Day 2                                                                                                            | FBS              Activin A              ITS<br>0.2%              100ng/ml              0.05X                                                       |
| D3         | Day 3                                                                                                            | FBS              KGF                      ITS              TGF- $\beta$ IV<br>0.2%              25ng/ml              0.1X              2.5 $\mu$ M |
| D4-5       | Day 4-5                                                                                                          | FBS              KGF                      ITS<br>0.2%              25ng/ml              0.1X                                                       |
| D6-8       | Day 6-8                                                                                                          | Noggin              TTNPB<br>100 ng/ml              3nM                                                                                            |
| D9-11      | Day 9-11                                                                                                         | Noggin              Alk5i II              DAPT<br>50 ng/ml              1 $\mu$ M              1 $\mu$ M                                           |
| D12-18     | Day12-18                                                                                                         | Alk5i II<br>1 $\mu$ M                                                                                                                              |
| D19-onward | Day 19                                                                                                           | Day 19 media on ward until ~ day 55                                                                                                                |

**Supplementary Table 11. hESC differentiation into  $\alpha$ -like cells – Backbone Media Formulation**

| <b>Day</b> | <b>Media components</b> |            |            |                      |         |
|------------|-------------------------|------------|------------|----------------------|---------|
| D0         | DMEM/F-12               | 1xGlutamax | 1xMEM-NEAA | 1x 2-Mercaptoethanol | 4% KSR  |
| D1-5       | RPMI                    | 1xGlutamax |            |                      |         |
| D6-8       | DMEM                    | 1xGlutamax |            |                      |         |
| D9-11      | DMEM/F-12               | 1xGlutamax | 1xMEM-NEAA | 1xB27                |         |
| D11-54     | DMEM/F-12               | 1xGlutamax | 1xMEM_NEAA | 1xB27                | 0.2%BSA |



**Supplementary Table 12. Chemicals and media components**

| <b>Components</b>                                     | <b>Vendor</b>         | <b>Cat. No.</b>  |
|-------------------------------------------------------|-----------------------|------------------|
| DMEM                                                  | Life Tech             | 11960-051        |
| DMEM-F12                                              | Life Tech             | 11320-033        |
| RPMI                                                  | Mediatech             | 15-040-CM        |
| HER $\beta$ 1(Heregulin- $\beta$ 1)                   | PeptoTech             | 100-03           |
| Activin A                                             | R&D                   | 338-AC/CF        |
| FGF-2                                                 | R&D                   | 233-FB/CF        |
| FBS                                                   | Corning               | 35-011-CV        |
| ITS (Insulin-Transferrin-Selenium)                    | Gibco                 | 41400045         |
| Wnt-3a                                                | R&D                   | 5036-WN-010/CF   |
| TGF- $\beta$ IV (TGF- $\beta$ RI Kinase Inhibitor IV) | CalBiochem            | 616454-2MG       |
| KGF (FGF-7)                                           | R&D                   | 251-KG-050/CF    |
| Noggin                                                | R&D                   | 3344-NG          |
| TTNPB                                                 | Sigma-Aldrich         | T3757-10MG       |
| Alk5i II (ALK5 Inhibitor 2)                           | Axxora                | ALX-270-445-M001 |
| DAPT                                                  | Sigma-Aldrich         | D5942-5MG        |
| Glutamax                                              | Gibco                 | 35050-061        |
| MEM-NEAA                                              | Gibco                 | 11140-050        |
| 2-Mercaptoethanol                                     | Emd-Millipore         | ES-007-E         |
| KSR (KnockOut <sup>TM</sup> Serum replacement)        | Gibco                 | 10828-028        |
| B27 (NeuroCult <sup>TM</sup> SM1 Neuronal)            | Stemcell Technologies | 5711             |
| BSA                                                   | Sigma-Aldrich         | A4503-50G        |
| Doxycycline                                           | Sigma-Aldrich         | D9891            |
| LDN                                                   | Fisher                | 04-0074-10       |

**Supplementary Table 13. CRISPR gRNA target sequences for targeting AAVS1 locus**

| <b>Primer</b> | <b>Sequence (5' to 3')</b> |
|---------------|----------------------------|
| AAVS1-cr1-ex  | GATGACCGAGTACAAGCCCA       |
| AAVS1-cr2-ex  | GACAGTACTAAGCTTTACTA       |

**Supplementary Table 14. Antibodies used for FACS analysis**

| <b>Manufacturer</b>                        | <b>Antibody</b> | <b>Catalogue No.</b> | <b>Dilution</b> | <b>Fluorophore</b> |
|--------------------------------------------|-----------------|----------------------|-----------------|--------------------|
| BD Pharmingen/Fisher                       | Foxa2           | 561589               | 1:100           | PE                 |
| BD Pharmingen/Fisher                       | Sox17           | 562205               | 1:100           | Alexa F. 488       |
| Biologend                                  | TRA-1-60-R      | 330605               | 1:200           | Alexa F. 647       |
| BD Pharmingen/Fisher                       | PDX1            | 562161               | 1:50            | PE                 |
| BD Pharmingen/Fisher                       | NKX6.1          | 563338               | 1:50            | Alexa F. 647       |
| BD Pharmingen/Fisher                       | C-peptide       | 051109MI             | 1:200           | Alexa F. 488       |
| Fisher                                     | PAX6            | 562249               | 1:50            | Alexa F. 647       |
| BD Pharmingen/Fisher                       | NKX2.2          | 564730               | 1:50            | PE                 |
| BD Pharmingen/Fisher                       | Chromogranin A  | BDB564563            | 1:50            | PE                 |
| Sigma                                      | Glucagon        | G2654                | 1:1000          | Alexa F. 647       |
| BD Pharmingen/Fisher                       | KI67            | 550609               | 1:20            | Alexa F. 647       |
| Millipore                                  | ARX             | MABN102              | 1:200           | PE                 |
| DAKO                                       | SST             | A0566                | 1:250           | Alexa F. 568       |
| Peninsula Laboratories International, Inc. | PPY             | T-4088               | 1:500           | Alexa F. 647       |

**Supplementary Table 15. Antibodies used for IF analysis**

| <b>Antibody</b> | <b>Species</b> | <b>IF Dilution</b> | <b>Company</b>                             | <b>Catalogue No.</b> |
|-----------------|----------------|--------------------|--------------------------------------------|----------------------|
| Somatostatin    | Rabbit         | 1:250              | DAKO                                       | A0566                |
| Somatostatin    | Sheep          | 1:250              | Biogenesis                                 | 8330-0350            |
| PDX1            | Goat           | 1:100              | R&D                                        | AF2419               |
| NKX6.1          | Mouse          | 1:100              | Hybridoma Bank, U Iowa                     | F55A10-c             |
| Sox17           | Goat           | 1:200              | R&D                                        | AF1924               |
| FoxA2           | Rabbit         | 1:1000             | Millipore                                  | 07-633               |
| KI-67           | Mouse          | 1:400              | BD                                         | 550609               |
| NGN3            | Sheep          | 1:200              | R&D                                        | AF3444               |
| Glucagon        | Rabbit         | 1:200              | Linco                                      | 4030-01F             |
| Glucagon        | Mouse          | 1:250              | Sigma                                      | G2654                |
| C-peptide       | Rat            | 1:1000             | DSHB                                       | GN-1D4-C             |
| NGN3            | Sheep          | 1:200              | R&D                                        | AF3444               |
| ARX             | Mouse          | 1:200              | Millipore                                  | MABN102              |
| HHEX            | Rabbit         | 1:200              | R&D                                        | MAB83771-100         |
| PPY             | Rabbit         | 1:2000             | Peninsula Laboratories International, Inc. | T-4088               |
| MAFB            | Rabbit         | 1:250              | Sigma                                      | HPA005653            |

**Supplementary Table 16. Antibodies used for WB analysis**

| <b>Antibody</b> | <b>Species</b> | <b>IF Dilution</b> | <b>Company</b> | <b>Catalogue No.</b> |
|-----------------|----------------|--------------------|----------------|----------------------|
| GAPDH           | Mouse          | 1:3000             | Santa Cruz     | sc-32233             |
| MAFB            | Rabbit         | 1:300              | Sigma          | HPA0055653           |
| Somatostatin    | Rabbit         | 1:2000             | Dako           | A0566                |
| Vinculin        | Mouse          | 1:10,000           | Santa Cruz     | sc-73614             |

**Supplementary Table 17. qPCR primer sequences**

| <b>Primer Name</b> | <b>Forward Sequence</b>  | <b>Reverse Sequence</b>  |
|--------------------|--------------------------|--------------------------|
| ALDH1A3            | TCTGAGGGTTCTAATACAGCCC   | CCCTGGAGACGATGGATACAG    |
| ARX                | GTGCAAGGCTCCCCTAAGAG     | CGTTCTCGCGGTACGACTT      |
| CHGA               | TGACCTCAACGATGCATTTT     | CTGTCCTGGCTCTTCTGCTC     |
| GAPDH              | CTCACCGGATGCACCAATGTT    | CGCGTTGCTCACAATGTTTAT    |
| GCG                | GAGATTTCCCAGAAGAGGTCG    | TGGCGGCAAGATTATCAAGAA    |
| GHRL               | CAACGCCCCCTTTGATGTTG     | CTGCTGGTACTGAACCCCTG     |
| HHEX               | GCGAGAGACAGGTCAAACC      | AGGGCGAACATTGAGAGCTA     |
| HNF6               | ATGTCCAGCGTCAACTCTAC     | TGCTTTGGTACAAGTGCTTGAT   |
| INS                | AGAGGCCATCAAGCAGATCACTGT | ACAGGTGTTGGTTCACAAAGGCTG |
| MAFA               | GAGAGCGAGAAGTGCCAACT     | TTCTCCTTGACAGGTCCCG      |
| MAFB               | CATAGAGAACGTGGCAGCAA     | ATGCCCGGAACTTTTTCTTT     |
| NEUROD1            | ATGACCAAATCGTACAGCGAG    | GTTTCATGGCTTCGAGGTCGT    |
| NGN3               | TAAGAGCGAGTTGGCACTGAGCAA | TTTGAGTCAGCGCCAGATGTAGT  |
| NKX2.2             | GGAGCTTGAGTCTTGAGGG      | TCTACGACAGCAGCGACAAC     |
| NKX6.1             | CCGAGTCCTGCTTCTTCTTG     | ATTCGTTGGGGATGACAGAG     |
| PAX4               | CTACCGCACAGGTGTCTTGG     | CGTTGGATTTCAGGCAA        |
| PAX6               | TGGGCAGGTATTACGAGACTG    | ACTCCCGCTTATACTGGGCTA    |
| PDX1               | TACTGGATTGGCGTTGTTTGTGGC | AGGGAGCCTTCCAATGTGTATGGT |
| PPY                | AGTGTACCCAGGGGACAATGC    | CAGCATGTTGAGTGTATCTACGGA |
| Pre-INS            | GTGAACCAACACCTGTGCGG     | AGGGGCAGCAATGGGCAGTT     |
| PTF1A              | TTCACCGACCAGTCTTCACG     | GTGGCTAAGGAACTCCACCT     |
| SOX9               | AGCGAACGCACATCAAGAC      | CTGTAGGCGATCTGTTGGGG     |
| SST                | CGCTGTCCATGGTCCTG        | GGGCATCATTCTCCGTCT       |
