# Supplementary material for: Loss of the transcription factor MAFB limits β-cell derivation from human PSCs
Source: PubMed Central journal article supplement (PMC7265500; doi:10.1038/s41467-020-16550-9), 2020-06-02
Supplement: 41467_2020_16550_MOESM3_ESM.pdf [file 41467_2020_16550_MOESM3_ESM.pdf]

## Reporting Summary

Nature Research wishes to improve the reproducibility of the work that we publish. This form provides structure for consistency and transparency in reporting. For further information on Nature Research policies, see [Authors & Referees](#) and the [Editorial Policy Checklist](#).

### Statistics

For all statistical analyses, confirm that the following items are present in the figure legend, table legend, main text, or Methods section.

n/a Confirmed

- The exact sample size ( $n$ ) for each experimental group/condition, given as a discrete number and unit of measurement
- A statement on whether measurements were taken from distinct samples or whether the same sample was measured repeatedly
- The statistical test(s) used AND whether they are one- or two-sided  
*Only common tests should be described solely by name; describe more complex techniques in the Methods section.*
- A description of all covariates tested
- A description of any assumptions or corrections, such as tests of normality and adjustment for multiple comparisons
- A full description of the statistical parameters including central tendency (e.g. means) or other basic estimates (e.g. regression coefficient) AND variation (e.g. standard deviation) or associated estimates of uncertainty (e.g. confidence intervals)
- For null hypothesis testing, the test statistic (e.g.  $F$ ,  $t$ ,  $r$ ) with confidence intervals, effect sizes, degrees of freedom and  $P$  value noted  
*Give  $P$  values as exact values whenever suitable.*
- For Bayesian analysis, information on the choice of priors and Markov chain Monte Carlo settings
- For hierarchical and complex designs, identification of the appropriate level for tests and full reporting of outcomes
- Estimates of effect sizes (e.g. Cohen's  $d$ , Pearson's  $r$ ), indicating how they were calculated

*Our web collection on [statistics for biologists](#) contains articles on many of the points above.*

### Software and code

Policy information about [availability of computer code](#)

Data collection

BD FACSDiva v. 6.0 software was used for flow cytometry data collection using BD LSRII.

Data analysis

Graphad Prism7/8  
FlowJo v10  
Microsoft Excel v.16.35  
Cell Ranger software v2.1.1  
STAR aligner v.2.7  
R package Seurat v.2.3.4  
ImageJ v1.51  
DESeq2 v.1.16.0  
TrimGalore 0.4.0  
MACS2.1.0  
Bowtie2 v. 2.3.5  
MAST v. 3.10  
FastQC 0.11.7  
No custom code was used.

For manuscripts utilizing custom algorithms or software that are central to the research but not yet described in published literature, software must be made available to editors/reviewers. We strongly encourage code deposition in a community repository (e.g. GitHub). See the Nature Research [guidelines for submitting code & software](#) for further information.

## Data

Policy information about [availability of data](#)

All manuscripts must include a [data availability statement](#). This statement should provide the following information, where applicable:

- Accession codes, unique identifiers, or web links for publicly available datasets
- A list of figures that have associated raw data
- A description of any restrictions on data availability

RNA sequences for the single-cell RNA-sequencing analyses reported in this paper have been deposited in the GEO database with the accession code GSE145347 [<https://www.ncbi.nlm.nih.gov/geo/query/acc.cgi?acc=GSE145347>]. MAFB ChIP seq data from EndoC- $\beta$ H2 cells was uploaded to ArrayExpress, accession E-MTAB-8612 [<https://www.ebi.ac.uk/arrayexpress/experiments/E-MTAB-8612/>]. MAFB ChIP seq data from human islets are available at Islet Regulome 80 [<http://www.isletregulome.org/>] and can be viewed using the UCSC Genome browser 81 [[https://genome.ucsc.edu/cgi-bin/hgTracks?db=hg19&lastVirtModeType=default&lastVirtModeExtraState=&virtModeType=default&virtMode=0&nonVirtPosition=&position=chr1%3A1%2D2&hgid=815997045\\_p41DjpFchqeSccV95h3OjaUelETa](https://genome.ucsc.edu/cgi-bin/hgTracks?db=hg19&lastVirtModeType=default&lastVirtModeExtraState=&virtModeType=default&virtMode=0&nonVirtPosition=&position=chr1%3A1%2D2&hgid=815997045_p41DjpFchqeSccV95h3OjaUelETa)]. The authors declare that all data supporting the findings Browser, of this study are available within the article and its supplementary information files or from the corresponding author (MH) upon reasonable request.

Figures with associated raw data:

Figure 4A,B  
Figure S5A,B,C  
Figure S6A,B,C,D  
Figure S7A  
Figure S8

## Field-specific reporting

Please select the one below that is the best fit for your research. If you are not sure, read the appropriate sections before making your selection.

Life sciences  Behavioural & social sciences  Ecological, evolutionary & environmental sciences

For a reference copy of the document with all sections, see [nature.com/documents/nr-reporting-summary-flat.pdf](https://www.nature.com/documents/nr-reporting-summary-flat.pdf)

## Life sciences study design

All studies must disclose on these points even when the disclosure is negative.

|                 |                                                                                                                                                                                                                                                                                                                                                                                                                                                                         |
|-----------------|-------------------------------------------------------------------------------------------------------------------------------------------------------------------------------------------------------------------------------------------------------------------------------------------------------------------------------------------------------------------------------------------------------------------------------------------------------------------------|
| Sample size     | Statistical methods were not used to determine sample size. Sample sizes were chosen based on availability of experimental samples. These sample sizes are sufficient since the study is very thorough and we have used a variety of experimental techniques to confirm the findings                                                                                                                                                                                    |
| Data exclusions | Stem Cell differentiations that did not pass a minimum criteria of 85% SOX17+/FOXA2+ double positive cells at the early stage of definitive endoderm were excluded from further analysis. This criteria was preselected because the formation of definitive endoderm is the first step toward pancreatic differentiation. When cells don't pass the above criteria, the spheres do not form pancreatic endoderm efficiently and start falling apart on further culture. |
| Replication     | At least 3 or more biological replicates were considered for the analysis using stage-matched controls as a reference. Using the above criteria, all replication attempts were successful. Additionally, we used a second hPSC cell line to confirm the major findings of the study. Samples of different stages of differentiation sent to other researchers confirmed our findings.                                                                                   |
| Randomization   | There was no randomization applicable for the in vitro experiments as cell lines had to be identified to establish independent clones. For transplantation experiments in vivo, mice were randomly assigned to receive either MAFB+/+ or MAFB-/- cells.                                                                                                                                                                                                                 |
| Blinding        | Investigators were blinded to samples collected from in vivo transplantation studies. Investigators were not blinded to group allocation as phenotypes were identifiable during the analysis.                                                                                                                                                                                                                                                                           |

## Reporting for specific materials, systems and methods

We require information from authors about some types of materials, experimental systems and methods used in many studies. Here, indicate whether each material, system or method listed is relevant to your study. If you are not sure if a list item applies to your research, read the appropriate section before selecting a response.

## Materials &amp; experimental systems

|                                     |                                                                 |
|-------------------------------------|-----------------------------------------------------------------|
| n/a                                 | Involved in the study                                           |
| <input type="checkbox"/>            | <input checked="" type="checkbox"/> Antibodies                  |
| <input type="checkbox"/>            | <input checked="" type="checkbox"/> Eukaryotic cell lines       |
| <input checked="" type="checkbox"/> | <input type="checkbox"/> Palaeontology                          |
| <input type="checkbox"/>            | <input checked="" type="checkbox"/> Animals and other organisms |
| <input checked="" type="checkbox"/> | <input type="checkbox"/> Human research participants            |
| <input checked="" type="checkbox"/> | <input type="checkbox"/> Clinical data                          |

## Methods

|                                     |                                                    |
|-------------------------------------|----------------------------------------------------|
| n/a                                 | Involved in the study                              |
| <input type="checkbox"/>            | <input checked="" type="checkbox"/> ChIP-seq       |
| <input type="checkbox"/>            | <input checked="" type="checkbox"/> Flow cytometry |
| <input checked="" type="checkbox"/> | <input type="checkbox"/> MRI-based neuroimaging    |

## Antibodies

## Antibodies used

Somatostatin Rabbit 1:250 DAKO A0566  
 Somatostatin Sheep 1:250 Biogenesis 8330-0350  
 PDX1 Goat 1:100 R&D AF2419  
 NKX6.1 Mouse 1:100 Hybridoma Bank, U Iowa F55A10-c  
 Sox17 Goat 1:200 R&D AF1924  
 FoxA2 Rabbit 1:1000 Millipore 07-633  
 KI-67 Mouse 1:400 BD 550609  
 NGN3 Sheep 1:200 R&D AF3444  
 Glucagon Rabbit 1:200 Linco 4030-01F  
 Glucagon Mouse 1:250 Sigma G2654  
 C-peptide Rat 1:1000 DSHB GN-1D4-C  
 NGN3 Sheep 1:200 R&D AF3444  
 ARX Mouse 1:200 Millipore MABN102  
 HHEX Rabbit 1:200 R&D MAB83771-100  
 PPY Rabbit 1:2000 Peninsula Laboratories International, Inc. T-4088  
 MAFB Rabbit 1:250 Sigma HPA005653  
 GAPDH Mouse 1:3000 Santa Cruz sc-32233  
 Vinculin Mouse 1:10,000 Santa Cruz sc-73614  
 BD Pharmingen/Fisher Foxa2 561589 1:100 PE  
 BD Pharmingen/Fisher Sox17 562205 1:100 Alexa F. 488  
 Biolegend TRA-1-60-R 330605 1:200 Alexa F. 647  
 BD Pharmingen/Fisher PDX1 562161 1:50 PE  
 BD Pharmingen/Fisher NKX6.1 563338 1:50 Alexa F. 647  
 BD Pharmingen/Fisher C-peptide 051109MI 1:200 Alexa F. 488  
 Fisher PAX6 562249 1:50 Alexa F. 647  
 BD Pharmingen/Fisher NKX2.2 564730 1:50 PE  
 BD Pharmingen/Fisher Chromogranin A BDB564563 1:50 PE  
 Sigma Glucagon G2654 1:1000 Alexa F. 647  
 BD Pharmingen/Fisher KI67 550609 1:20 Alexa F. 647  
 Millipore ARX MABN102 1:200 PE  
 DAKO SST A0566 1:250 Alexa F. 568  
 Peninsula Laboratories International, Inc. PPY T-4088 1:500 Alexa F. 647  
 MafB Recombinant Monoclonal Antibody [BLR046F], A700-046  
 Goat anti-SST, Santa Cruz (D-20) sc-7819

## Validation

The primary antibodies for immunofluorescent staining were validated on Human pancreatic sections using various dilutions (according to the manufacturer's instructions). Primary antibody only- and secondary antibody only- controls were used to evaluate the specificity of the antibodies to the respective epitopes.  
 The expression patterns observed with all the antibodies included in our paper display stage-specific expression by immunostaining and flow cytometry.

## Eukaryotic cell lines

Policy information about [cell lines](#)

## Cell line source(s)

The human ES-cell line, Mel1 INSGFP/W used in the study is available from Prof. Ed Stanley at Murdoch Children's Research Institute under MTA in place with Murdoch Children's Research Institute.  
 hiPSCs are commercially available from Gibco #A18945.

## Authentication

None of the cell lines were authenticated.

## Mycoplasma contamination

All cell lines tested negative for mycoplasma contamination.

Commonly misidentified lines  
(See [ICLAC](#) register)

No cell lines used in this study were reported in the ICLAC register.

## Animals and other organisms

Policy information about [studies involving animals](#); [ARRIVE guidelines](#) recommended for reporting animal research

Laboratory animals

NOD.Cg-Prkdcscid Il2rgtm1Wjl/SzJ (NSG) male and female mice at 8-12 weeks old were obtained from Jackson Laboratories. Mice were maintained at a constant humidity between 30-70% and temperature 68-79 degrees Fahrenheit, under a 12-h light/dark cycle and had free access to food and water until experiment initiation.

Wild animals

No wild animals we used in this study.

Field-collected samples

Field samples were not collected for this study.

Ethics oversight

All animal experiments were performed in accordance with the International Animal Care and Use Committee (IACUC) regulations at UCSF.

Note that full information on the approval of the study protocol must also be provided in the manuscript.

## ChIP-seq

### Data deposition

Confirm that both raw and final processed data have been deposited in a public database such as [GEO](#).

Confirm that you have deposited or provided access to graph files (e.g. BED files) for the called peaks.

Data access links

*May remain private before publication.*

E-MTAB-8612  
<http://www.isletregulome.org>

Files in database submission

5359-RS-0001\_trimmed.fq.gz, 5359-RS-0003\_trimmed.fq.gz, 5359-RS-0005\_trimmed.fq.gz

Genome browser session  
(e.g. [UCSC](#))

E-MTAB-8612  
<http://www.isletregulome.org>

### Methodology

Replicates

Three treatment replicates were collected

Sequencing depth

20-24M/sample

Antibodies

anti-MAFB (Bethyl BL658)

Peak calling parameters

Read mapping was performed on TrimGalore-trimmed FastQ files via Bowtie2, using bowtie2\_ucsc\_hg19 genome reference. For each treatment mapped file (sorted BAM), MACS2 was used for peak detection using default parameters and -bw 300.

Data quality

2573 peaks at at FDR 5% and above 5-fold enrichment

Software

Library construction was performed by HudsonAlpha, using HiSeq v4 chemistry and single-ended sequencing was performed on an Illumina HiSeq2500. The 50bp reads from each sample were initially assessed FastQC 0.11.7 76. Following quality-filtering and adapter trimming with TrimGalore 0.4.0 77, the remaining reads were aligned to the UCSC reference human genome (hg19, GRCh37) with Bowtie2 and then further filtered prior to peak calling, which was performed with MACS2.1.0 78. No custom code was used.

## Flow Cytometry

### Plots

Confirm that:

The axis labels state the marker and fluorochrome used (e.g. CD4-FITC).

The axis scales are clearly visible. Include numbers along axes only for bottom left plot of group (a 'group' is an analysis of identical markers).

All plots are contour plots with outliers or pseudocolor plots.

A numerical value for number of cells or percentage (with statistics) is provided.

### Methodology

Sample preparation

Cells were dissociated using accumax. Cells were then fixed with 4% PFA.

|                           |                                                                                                                                                                                      |
|---------------------------|--------------------------------------------------------------------------------------------------------------------------------------------------------------------------------------|
| Instrument                | LSRFortessa X20 Dual, Aria II                                                                                                                                                        |
| Software                  | FACS DIVA / FlowJo software                                                                                                                                                          |
| Cell population abundance | Flow cytometry was used for marker expression analysis of fixed samples. No cell sorting was performed.                                                                              |
| Gating strategy           | Gating was based on stage matched samples that were unstained or negatively stained for the associated markers and an example of the strategy is shown in Supplementary Figure 16 E. |

Tick this box to confirm that a figure exemplifying the gating strategy is provided in the Supplementary Information.
